# Supplementary material for: Lactogenic hormones in relation to maternal metabolic health in pregnancy and postpartum: protocol for a systematic review
Source: PubMed Central journal article supplement — BMJ Open. 2022 Feb 18;12(2):e055257. doi: 10.1136/bmjopen-2021-055257 (PMC8860010; doi:10.1136/bmjopen-2021-055257), 2022-02-18
Supplement: bmjopen-2021-055257.draft_revisions.pdf [file bmjopen-2021-055257.draft_revisions.pdf]

# BMJ Open

BMJ Open is committed to open peer review. As part of this commitment we make the peer review history of every article we publish publicly available.

When an article is published we post the peer reviewers' comments and the authors' responses online. We also post the versions of the paper that were used during peer review. These are the versions that the peer review comments apply to.

The versions of the paper that follow are the versions that were submitted during the peer review process. They are not the versions of record or the final published versions. They should not be cited or distributed as the published version of this manuscript.

BMJ Open is an open access journal and the full, final, typeset and author-corrected version of record of the manuscript is available on our site with no access controls, subscription charges or pay-per-view fees (<http://bmjopen.bmj.com>).

If you have any questions on BMJ Open's open peer review process please email [info.bmjopen@bmj.com](mailto:info.bmjopen@bmj.com)

# BMJ Open

## Lactogenic hormones in relation to maternal metabolic health in pregnancy and postpartum: protocol for a systematic review

|                               |                                                                                                                                                                                                                                                                                                                                                                                                                                                              |
|-------------------------------|--------------------------------------------------------------------------------------------------------------------------------------------------------------------------------------------------------------------------------------------------------------------------------------------------------------------------------------------------------------------------------------------------------------------------------------------------------------|
| Journal:                      | <i>BMJ Open</i>                                                                                                                                                                                                                                                                                                                                                                                                                                              |
| Manuscript ID                 | bmjopen-2021-055257                                                                                                                                                                                                                                                                                                                                                                                                                                          |
| Article Type:                 | Protocol                                                                                                                                                                                                                                                                                                                                                                                                                                                     |
| Date Submitted by the Author: | 08-Jul-2021                                                                                                                                                                                                                                                                                                                                                                                                                                                  |
| Complete List of Authors:     | Rassie, Kate; Monash Centre for Health Research and Implementation, ; Monash Health, Department of Diabetes<br>Giri, Rinky; Monash Health, Department of Diabetes<br>Melder, Angela; Monash Univeristy, Monash Centre for Health Research and Implementation,<br>Joham, Anju; Monash University<br>Mousa, Aya; Monash University, School of Public Health and Preventice Medicine<br>Teede, Helena; Monash University; Monash Health, Department of Diabetes |
| Keywords:                     | Diabetes & endocrinology < INTERNAL MEDICINE, Diabetes in pregnancy < DIABETES & ENDOCRINOLOGY, Maternal medicine < OBSTETRICS                                                                                                                                                                                                                                                                                                                               |
|                               |                                                                                                                                                                                                                                                                                                                                                                                                                                                              |

SCHOLARONE™  
Manuscripts

1  
2  
3  
4  
5  
6  
7  
8  
9  
10  
11  
12  
13  
14  
15  
16  
17  
18  
19  
20  
21  
22  
23  
24  
25  
26  
27  
28  
29  
30  
31  
32  
33  
34  
35  
36  
37  
38  
39  
40  
41  
42  
43  
44  
45  
46  
47  
48  
49  
50  
51  
52  
53  
54  
55  
56  
57  
58  
59  
60

**Lactogenic hormones in relation to maternal metabolic health in pregnancy and postpartum: protocol for a systematic review**

Kate Rassie<sup>1,2</sup>, Rinky Giri<sup>2</sup>, Angela M Melder<sup>1</sup>, Anju Joham<sup>1,2</sup>, Aya Mousa<sup>1</sup>, Helena Teede<sup>1,2</sup>

<sup>1</sup> Monash Centre for Health Research and Implementation (MCHRI), School of Public Health and Preventive Medicine, Monash University

<sup>2</sup> Department of Diabetes, Monash Health, Melbourne, Australia

**\*Corresponding author:**

Prof. Helena J Teede, MBBS PhD FRACP

Monash Centre for Health Research and Implementation (MCHRI)

School of Public Health and Preventive Medicine, Monash University

Level 1, 43-51 Kanooka Grove, Clayton

Melbourne, VIC 3168, Australia

Telephone: +61 3 8572 2643; Fax: +61 3 9594 7554

Email: [helena.teede@monash.edu](mailto:helena.teede@monash.edu)

**Word count: 3989** (excluding abstract, figures, tables, acknowledgements, and references)

**Tables: 2**

**Figures: 0**

**Supplementary materials:**

Supplementary materials 1 – search strategy

Supplementary materials 2 – critical appraisal template

**Keywords:** diabetes, gestational; diabetes mellitus; obesity, maternal; prolactin; placental lactogen

## ABSTRACT

**Introduction:** Maternal metabolic disease states (such as gestational and pre-gestational diabetes, and maternal obesity) are reaching epidemic proportions worldwide and are associated with adverse maternal and fetal outcomes. Despite this, their aetiology remains incompletely understood. Lactogenic hormones, namely human placental lactogen and prolactin, play often overlooked roles in maternal metabolism and glucose homeostasis during pregnancy and (in the case of prolactin) postpartum, and have clinical potential from a diagnostic and therapeutic perspective. This manuscript presents a protocol for a systematic review which will synthesise the available scientific evidence linking these two hormones to maternal and fetal metabolic conditions/ outcomes.

**Methods and analysis:** Medline (via OVID), CINAHL and EMBASE will be systematically searched for original observational and interventional research articles linking human placental lactogen and/ or prolactin levels (in pregnancy and/ or up to 12 months postpartum) to key maternal metabolic conditions/ outcomes (including pre-existing and gestational diabetes, markers of glucose/ insulin metabolism, postpartum glucose status, weight change obesity and polycystic ovary syndrome). Relevant fetal outcomes (birthweight and placental mass, macrosomia and growth restriction) will also be included. Two reviewers will assess articles for eligibility according to pre-specified selection criteria, followed by full text review, quality appraisal and data extraction. Where possible, meta-analysis will be performed, otherwise a narrative synthesis of findings will be presented.

**Ethics and dissemination:** Formal ethical approval is not required as no primary data will be collected. The results will be published in a peer-reviewed journal and presented at conference meetings, and will be used to inform future research directions.

**PROSPERO registration details** receipt 262771, CRD registration number pending

**ARTICLE SUMMARY****STRENGTHS AND LIMITATIONS OF THIS STUDY**

- Novel and relevant research area linking lactation hormones to maternal metabolic health, with particular relevance to pregnancies affected by obesity and/ or diabetes
- Protocol is for the first systematic review in this area
- Employs rigorous, standardised methodology; and will involve an exhaustive literature search and quality appraisal
- Limitations include the anticipated heterogeneity in study designs, most of which will likely be observational in nature and hence unable to establish causality.

For peer review only

## INTRODUCTION

Pregnancy entails profound maternal physiological and metabolic adaptations to accommodate the needs of the growing fetus, and to prepare for lactation. An increase in insulin resistance of 50-60% between pre-pregnancy and the late third trimester is a physiologic change in every pregnancy (regardless of glucose tolerance), and is essential to prioritise the delivery of glucose across the placenta for fetal development [1]. This is paralleled - in a normal pregnancy - by adaptive changes in the islets of the maternal endocrine pancreas to allow increasing insulin synthesis and secretion, including an increased beta-cell mass. Overall, this results in maintenance of maternal glucose homeostasis [1].

Gestational diabetes mellitus (GDM) may develop when there is failure to balance insulin secretion with the composite of pre-pregnancy and pregnancy-induced insulin resistance, and is an increasingly prevalent condition (affecting between 2 and 38% of pregnant women worldwide) [2]. GDM is associated with multiple adverse maternal and fetal outcomes, including macrosomia, pre-eclampsia and gestational hypertension, polyhydramnios, stillbirth, and neonatal hypoglycaemia; as well as an increased lifetime risk of obesity and dysglycaemia in the offspring [3]. In women with pre-existing diabetes mellitus (type 1 or type 2), superimposed pregnancy-induced insulin resistance exacerbates established pre-gestational insulin resistance and/ or deficiency, with similar potential complications.

Lactogenic hormones, chiefly human placental lactogen (hPL) and prolactin (PRL), are well-recognised for their roles in the antenatal preparation of the breast for lactation, and – in the case of PRL – in establishing and maintaining lactation after delivery. However, these hormones also have central roles in maternal metabolism: during gestation, both contribute to insulin resistance but are also likely to act as stimuli for the adaptation of maternal pancreatic islet function. Postpartum, the hormonal control of lactation (primarily mediated by PRL) may

1  
2  
3 fundamentally alter carbohydrate and lipid metabolism and adipocyte biology, guarding  
4  
5 lactating postpartum women against progression to type 2 diabetes [4].  
6  
7

8 **Human placental lactogen** is a peptide hormone produced by the placenta. It is detectable as  
9  
10 early as 6 weeks' gestation and increases across gestation, peaking at around 30 weeks. The  
11  
12 secretion rate of hPL near term is about 1g/ day (a rate considerably greater than that of any  
13  
14 other protein hormone) [5] and the peak concentration of hPL is at least 25-fold that of PRL  
15  
16 [4]. hPL binds with high affinity to the PRL receptor, and is increasingly recognised as playing  
17  
18 a major role in the modulation of maternal metabolism to meet the energy requirements of the  
19  
20 growing fetus [6]. It is also involved in lactogenesis I (secretory initiation), supporting alveolar  
21  
22 and ductal growth in the breast in preparation for milk production [5].  
23  
24  
25

26  
27 As one of the major 'diabetogenic' hormones of pregnancy (alongside placental growth  
28  
29 hormone, progesterone, cortisol, and PRL), hPL increases maternal insulin resistance and  
30  
31 reduces maternal glucose utilisation, elevating maternal blood glucose levels (supporting  
32  
33 transplacental glucose transfer and adequate fetal nutrition) [4]. However, this appears to be  
34  
35 matched by upregulation of insulin secretory capacity. In rodent models, placental lactogens  
36  
37 significantly increase glucose-induced insulin secretion, beta-cell proliferation and survival in  
38  
39 isolated pancreatic islets [7-9]. In humans, in vitro evidence using human islet cell tissue  
40  
41 suggests that hPL also acts (likely via the PRL receptor) on the endocrine pancreas to promote  
42  
43 maternal beta-cell function, enhancing insulin synthesis and glucose-stimulated insulin  
44  
45 secretion [9]. The net effect of this is – in a healthy pregnancy – maintenance of maternal  
46  
47 normoglycaemia.  
48  
49  
50  
51

52  
53 Human placental lactogen also increases lipolysis and release of free fatty acids (FFAs). With  
54  
55 maternal fasting, hPL release increases the availability of FFAs to the mother for use as fuel;  
56  
57 sparing glucose and amino acids for placental transport and fetal nutrition [10]. hPL is also  
58  
59 likely to play a role in inducing and maintaining the state of physiological hyperleptinaemia  
60

1  
2  
3 but relative leptin-resistance seen in pregnancy, which provides maternal appetite stimulus  
4 even with increasing adipose deposition [4]. Human placental lactogen (and PRL) also seem to  
5  
6 increase appetite and food intake via other mechanisms, with widespread distribution of PRL  
7  
8 receptors in the hypothalamus and induction of hyperphagia after intracerebroventricular  
9  
10 administration suggesting a central mode of action [11].  
11  
12  
13

14  
15 Being placentally-derived, hPL is also positively correlated with birthweight and placental  
16  
17 mass; with potential clinical application in the antenatal prediction of macrosomia and/ or fetal  
18  
19 growth restriction in both metabolically-normal and abnormal pregnancies [12].  
20  
21  
22

23 **Prolactin** is a peptide hormone produced by lactotrophs in the anterior pituitary gland, and has  
24  
25 close structural homology to hPL. Basal serum PRL increases progressively during normal  
26  
27 pregnancy, with peak values in late gestation approximately 10-fold higher than pre-conception  
28  
29 [4]. Whilst best known for its lactogenic effect on the female mammary gland, PRL also alters  
30  
31 insulin sensitivity and lipid metabolism. PRL induces insulin resistance outside of pregnancy  
32  
33 (as demonstrated in non-pregnant prolactinoma patients with pathological PRL elevation) [13];  
34  
35 and, like hPL, is likely to contribute to the insulin resistant state of pregnancy, ensuring the  
36  
37 availability of glucose for the fetal-placental compartment. However, the physiological  
38  
39 contribution of PRL to glucose tolerance in pregnancy and postpartum is thought to differ from  
40  
41 other states of relative or absolute hyperprolactinaemia [4]. In vitro evidence suggests that PRL  
42  
43 (like hPL) can directly enhance insulin secretion from human islets, although the latter  
44  
45 hormone may have the dominant effect during human pregnancy due to its higher  
46  
47 concentrations [9]. It is worth noting that rodent evidence for the effect of PRL on maternal  
48  
49 beta-cell function during pregnancy is striking: knockout mice specifically lacking PRL  
50  
51 receptors on pancreatic beta-cells have normal glucose tolerance outside of pregnancy, but  
52  
53 become progressively glucose intolerant with gestation due to corresponding failure of beta-  
54  
55 cell proliferation – essentially, developing GDM [14, 15].  
56  
57  
58  
59  
60



1  
2  
3 Postpartum, physiological hyperprolactinaemia is the key endocrine change responsible for the  
4 initiation and maintenance of lactation. Prolactin concentrations during lactation are  
5 intermediate between those in the non-pregnant state and those in late pregnancy, and the  
6 pulsatile nature of secretion (lost during pregnancy) is restored. PRL surges occur following  
7 nursing, and peaks are higher in women who exclusively breastfeed their infants than in those  
8 who supplement with formula or only feed formula. In women who do not breastfeed, PRL  
9 falls to non-pregnant concentrations within 3 weeks postpartum [4].

10  
11  
12  
13  
14  
15  
16  
17  
18  
19  
20 Lactation – under the chief control of PRL – is a unique metabolic state associated with an  
21 elevation of plasma FFAs, and with the mobilisation of lipids from diet and adipose stores to  
22 the breast for milk production. Observational evidence suggests that lactation is associated with  
23 maternal metabolic benefits, with consistent findings of lower rates of persistent postpartum  
24 dysglycaemia and progression to type 2 diabetes in women who breastfeed compared with  
25 those who do not (both in the general population [16] and following GDM pregnancy [17]). As  
26 such, PRL may link effective and sustained lactogenesis to improved maternal metabolic status  
27 postpartum. Whether this is primarily mediated by improved insulin secretory capacity or  
28 reduced insulin resistance remains unclear, as there are putative biological mechanisms for  
29 both [4, 18, 19]. Regardless, lactation may present a particular window of opportunity for  
30 women with postpartum insulin resistance (relevant to many women following a GDM  
31 pregnancy) to significantly improve long-term health outcomes by improving insulin secretion  
32 and/or sensitivity. Indeed, some authors have argued that lactation (quite apart from its other  
33 benefits to mother and offspring) may be seen as a therapeutic intervention in this patient cohort,  
34 analogous to the prescription of an insulin-sensitising medication [4].

35  
36  
37  
38  
39  
40  
41  
42  
43  
44  
45  
46  
47  
48  
49  
50  
51  
52  
53  
54  
55 It is also increasingly apparent that the relationship between impaired glucose/ insulin  
56 metabolism and poor lactation outcomes may be bidirectional. Whilst lactation outcomes are  
57 not the focus of this review, women with obesity and/ or diabetes are at increased risk of  
58 lactogenesis delay and persistent poor milk supply [20, 21], reasons for which may include a  
59  
60

1  
2  
3 suboptimal PRL response to infant suckling [22] and impaired insulin-receptor dynamics at the  
4 level of the lactocyte [23]. Authors linking PRL to glucose dynamics during lactation have  
5 suggested that “good beta-cell plasticity” in metabolically-healthy women may exert a  
6 permissive effect on lactation, allowing PRL to play its primary evolutionary role [18]. As  
7 such, the women who stand to benefit most from the metabolic benefits of sustained lactation  
8 may face the most barriers to achieving it. A more complete understanding of lactogenic  
9 hormone action, and how it is altered in metabolically-abnormal pregnancies, is essential to  
10 promote and support lactation in this population.  
11  
12

13  
14  
15  
16  
17  
18  
19  
20  
21  
22 Narrative reviews (which constitute the majority of the existing work in this area, and have  
23 produced many of the current mechanistic hypotheses) are often incomplete or reach subjective  
24 conclusions. Systematic reviews focused on key physiological questions are under-utilised in  
25 contemporary endocrine literature, and provide an opportunity to move toward extensive  
26 synthesis with objective, evidence-based conclusions. This review aims to systematically  
27 examine the relationship between hPL and PRL and maternal metabolism in pregnancy and  
28 postpartum, particularly in relation to common gestational metabolic conditions; as well as the  
29 association between hPL and PRL and key fetal outcomes. It also aims to provide mechanistic  
30 insights and to examine the clinical implications of these findings, from both a diagnostic and  
31 therapeutic perspective.  
32  
33  
34  
35  
36  
37  
38  
39  
40  
41  
42  
43  
44  
45

#### 46 **SYSTEMATIC REVIEW QUESTION**

47  
48 In pregnant women (participants) what is the relationship between hPL/ PRL levels  
49 (exposures) and  
50

- 51  
52  
53  
54 (a) maternal gestational metabolic status/ outcomes?  
55  
56 (b) relevant fetal outcomes?  
57  
58 (c) maternal metabolic outcomes up to 12 months postpartum?  
59  
60

## METHODS/ DESIGN

Rigorous international gold-standard methodology will be adopted in this review, which will conform to the Preferred Reporting Items for Systematic Reviews and Meta-Analysis (PRISMA) guidelines [24]. This review has been submitted for registration in the international prospective register of systematic reviews (PROSPERO), receipt code 262771 (CRD number pending). We used the PRISMA-P checklist when writing this protocol paper [25]. Any future amendments to this protocol will be reported on PROSPERO and published with the results of the review.

## ELIGIBILITY CRITERIA

Selection criteria using a modified version of the Participant, Exposure, Comparison, Outcome and Study Type (PECOT) framework [26] (table 1), established a priori, will be used to determine the eligibility of articles to include in this review. There will be no date or language limits for eligibility. It should be noted that the review aims to elucidate the *relationship* between maternal serum hPL/PRL levels and metabolic/ fetal conditions/ outcomes, without assuming causality or directionality. The designation of hPL and PRL levels as ‘exposure’ and the listed outcomes as ‘outcomes’ is somewhat arbitrary and may not apply to all studies: some may work in the opposite direction. For example, studies that enrol women with pre-existing diabetes or GDM (relevant metabolic exposure) and look at PRL and hPL levels across gestation (outcome) would warrant inclusion. It is acknowledged by the reviewers that the relationship between lactogenic hormones and maternal metabolism is likely bidirectional; and the inclusion criteria will reflect this.

**Table 1:** Modified PECOT framework for study inclusion/ exclusion

|                           | <b>Participants (P)</b>                                                                                                                                                   | <b>Exposure (E)</b>                                                                                                                                                                                                                                                                                                                                                                                            | <b>Comparison (C)</b>                                                           | <b>Outcomes (O)</b>                                                                                                                                                                                                                                                                                                                                                                                                                                                                                                                                 | <b>Study types (T)</b>                                                                                                                                                                                                           |
|---------------------------|---------------------------------------------------------------------------------------------------------------------------------------------------------------------------|----------------------------------------------------------------------------------------------------------------------------------------------------------------------------------------------------------------------------------------------------------------------------------------------------------------------------------------------------------------------------------------------------------------|---------------------------------------------------------------------------------|-----------------------------------------------------------------------------------------------------------------------------------------------------------------------------------------------------------------------------------------------------------------------------------------------------------------------------------------------------------------------------------------------------------------------------------------------------------------------------------------------------------------------------------------------------|----------------------------------------------------------------------------------------------------------------------------------------------------------------------------------------------------------------------------------|
| <b>Inclusion criteria</b> | Pregnant women<br>Women up to 12 months postpartum (regardless of lactation status)                                                                                       | Endogenous maternal serum hPL* (recorded at least once during pregnancy)<br><b>OR</b><br>Endogenous maternal serum PRL (recorded at least once during pregnancy and/ or up to 12 months postpartum)                                                                                                                                                                                                            | Studies with any /multiple control group/s or no control group will be included | <b>Maternal:</b><br>Glucose status during pregnancy and up to 12 months postpartum (pre-existing diabetes [any type] or GDM)<br>Metabolic indices related to maternal glucose/ lipid metabolism (e.g. glucose measurements, insulin secretion, sensitivity/ resistance, beta-cell function) during pregnancy or postpartum<br>Obesity, gestational weight gain<br>Postpartum weight change<br>Polycystic ovary syndrome<br>Lipid profile<br><b>Infant:</b><br>Birthweight (absolute / centiles, macrosomia)<br>Growth restriction<br>Placental mass | Longitudinal cohort<br>Case control<br>Cross-sectional studies<br>Randomised controlled trials<br>Clinical observational human trials (eg. infusion/ clamp studies)<br>Systematic reviews (to be examined for eligible articles) |
| <b>Exclusion criteria</b> | Non-pregnant populations<br>Males<br>Pathological / iatrogenic elevation of PRL (e.g. prolactinoma, medication-induced hyperprolactinaemia) or hPL (e.g. molar pregnancy) | hPL/PRL levels in other fluids (e.g. amniotic fluid), in fetus or infant, or in cord blood<br>hPL/PRL administered exogenously<br>Trials examining an intervention/ procedure (e.g. amniocentesis, induction of labour, drug treatment) with hPL/PRL as outcome<br>Trials focused on ART and ART outcomes<br>Trials examining 'lactation' as exposure (in relation to metabolic outcomes) without PRL measured | None                                                                            | Outcomes unrelated to named key maternal metabolic or infant outcomes, (e.g. placental function / perfusion / blood flow without mention of weight or FGR [e.g. Doppler indices alone])<br>Fetal structural abnormalities/ congenital malformations<br>Miscarriage / pregnancy loss<br>Diabetic retinopathy<br>Lactation outcomes / parameters (milk transfer, milk production, infant weight change during breastfeeding)                                                                                                                          | Animal studies<br>In vitro/ tissue culture studies<br>Narrative reviews<br>Commentaries/ letters<br>Case reports<br>Conference abstracts<br>Expert opinion<br>Protocol papers                                                    |

\*alternative name, *human chorionic somatomammotropin*, also included in search (and studies eligible for inclusion)

Abbreviations: hPL, human placental lactogen; PRL, prolactin; ART, assisted reproductive technologies; GDM, gestational diabetes mellitus; FGR, fetal growth restriction.

## SEARCH STRATEGY

A systematic search strategy using relevant search terms, in accordance with the selection criteria (Table 1) has been developed (see *supplementary material 1*), in consultation with expert subject librarians. A combination of keywords and database-specific subject headings will be used. The following electronic databases will be searched:

- MEDLINE via OVID
- MEDLINE ePub ahead of print, in-process, in-data review and other non-indexed citations via OVID
- CINAHL plus
- EMBASE

Bibliographies of relevant studies identified by the search strategy, and relevant reviews/ meta-analyses, will also be manually searched for identification of additional eligible studies.

## INCLUSION OF STUDIES

References will be screened and managed using EndNote x9 and Covidence software. Two reviewers will scan the titles, abstracts and keywords of every record retrieved by the search strategy, assessing eligibility according to the inclusion and exclusion criteria in Table 1 (and in consultation with a third reviewer where required). A pilot test of the selection criteria will be conducted on 20-30 article titles and abstracts in order to refine and clarify the criteria prior to the formal commencement of screening.

If initial information suggests that an article meets the selection criteria for eligibility, the full text will be retrieved for further assessment by two reviewers. Disagreement between reviewers as to whether a study meets inclusion criteria will be resolved by discussion, with referral to a third reviewer if consensus cannot be reached. Studies excluded based on full text review will

1  
2  
3 be tabulated along with reasons for their exclusion. Following PRISMA guidelines [24], a flow  
4  
5 diagram will be created to illustrate the selection process.  
6  
7

## 8 QUALITY APPRAISAL OF THE EVIDENCE 9

10  
11 Methodological quality of the included studies will be assessed by two independent reviewers  
12  
13 using criteria established *a priori*, outlined in the Monash Centre for Health Research and  
14  
15 Implementation (MCHRI) Evidence Synthesis Program critical appraisal template [27], see  
16  
17 *supplementary material 2*. Individual quality items will be investigated using a descriptive  
18  
19 component approach. Assessment will be based on criteria relating to external validity  
20  
21 (population, setting, clarity of study objectives, inclusion and exclusion criteria,  
22  
23 appropriateness of study design, and follow-up) and internal validity (selection, performance  
24  
25 and detection bias, attrition, exposure and outcome measurement, reporting bias and potential  
26  
27 confounders). Other domains for assessment will include potential conflicts of interest, study  
28  
29 power, and appropriateness/ quality of statistical methodology. Any disagreement or  
30  
31 uncertainty will be resolved by discussion among review authors. Using this approach, each  
32  
33 study will be allocated a risk of bias rating.  
34  
35  
36  
37  
38

## 39 DATA EXTRACTION 40

41  
42 Data will be extracted from all included studies by two independent reviewers, using a  
43  
44 specifically-developed data extraction form. Pilot testing of the form will be conducted using  
45  
46 3-5 studies of different formats to ensure all required data are captured, particularly given the  
47  
48 anticipated heterogeneity in study design. Key anticipated domains for extraction are shown in  
49  
50 Table 2. Relevant data which are not reported in published studies will be requested from  
51  
52 corresponding authors.  
53  
54  
55  
56  
57  
58  
59  
60

**Table 2.** Key domains for data extraction

|                                                                                                         |                                                                                                                                                                                                                                                                                                                                                                                                                                                                                                                                                                                                                                                                                                                                                                                                                                                                                                                                                                         |
|---------------------------------------------------------------------------------------------------------|-------------------------------------------------------------------------------------------------------------------------------------------------------------------------------------------------------------------------------------------------------------------------------------------------------------------------------------------------------------------------------------------------------------------------------------------------------------------------------------------------------------------------------------------------------------------------------------------------------------------------------------------------------------------------------------------------------------------------------------------------------------------------------------------------------------------------------------------------------------------------------------------------------------------------------------------------------------------------|
| <b>Study</b>                                                                                            | First author<br>Journal<br>Country and year of publication<br>Study design<br>Follow-up duration                                                                                                                                                                                                                                                                                                                                                                                                                                                                                                                                                                                                                                                                                                                                                                                                                                                                        |
| <b>Participants</b>                                                                                     | Number of participants<br>Participant characteristics (at baseline) <ul style="list-style-type: none"> <li>- Baseline (pre-pregnancy) metabolic conditions, if present</li> <li>- Mean age</li> <li>- Parity</li> <li>- Ethnicity</li> <li>- Singleton/ multiple pregnancy</li> <li>- Gestation at enrolment/ recruitment</li> <li>- Mean BMI</li> <li>- Delivery mode</li> <li>- Breastfeeding status</li> </ul> If control group present, control characteristics (at baseline) <ul style="list-style-type: none"> <li>- Mean age</li> <li>- Parity</li> <li>- Ethnicity</li> <li>- Singleton/ multiple pregnancy</li> <li>- Gestation at enrolment/ recruitment</li> <li>- Mean BMI</li> <li>- Delivery mode</li> <li>- Breastfeeding status</li> </ul>                                                                                                                                                                                                              |
| <b>Exposure* (lactogenic hormone)</b>                                                                   | Hormone measured (hPL/ PRL/both)<br>Number of timepoints<br>Time points (pregnancy), with concentration and units of hormone at each time point<br>Time points (postpartum), with concentration and units of hormone at each time point                                                                                                                                                                                                                                                                                                                                                                                                                                                                                                                                                                                                                                                                                                                                 |
| <b>Key maternal metabolic outcome(s)* of interest</b>                                                   | Key maternal “outcomes” assessed (from list)* <ul style="list-style-type: none"> <li>For diabetes in pregnancy <ul style="list-style-type: none"> <li>- Pre-existing (T1/T2DM) or gestational</li> <li>- Gestation at diagnosis</li> <li>- Method used for diagnosis (eg OGTT)</li> <li>- Diagnostic criteria if stated</li> <li>- Treatment (diet/ oral medications/ insulin); and treatment commencement timepoint</li> </ul> </li> <li>For postpartum glucose status <ul style="list-style-type: none"> <li>- Time point</li> <li>- Method used for diagnosis (eg OGTT)</li> <li>- Diagnostic criteria, if stated</li> <li>- Prevalence of persistent dysglycaemia postpartum</li> </ul> </li> <li>Relationship of said outcome(s) to hPL/PRL levels (as t-test result, odds ratio, regression coefficient etc) <ul style="list-style-type: none"> <li>- Unadjusted</li> <li>- After adjustment (with list of covariates included in model/s)</li> </ul> </li> </ul> |
| <i>Glucose status in pregnancy (pre-existing diabetes mellitus of any type OR gestational diabetes)</i> |                                                                                                                                                                                                                                                                                                                                                                                                                                                                                                                                                                                                                                                                                                                                                                                                                                                                                                                                                                         |
| <i>Postpartum glucose status</i>                                                                        |                                                                                                                                                                                                                                                                                                                                                                                                                                                                                                                                                                                                                                                                                                                                                                                                                                                                                                                                                                         |
| <i>Continuous metabolic indices related to maternal glucose/ lipid metabolism e.g. measures of</i>      |                                                                                                                                                                                                                                                                                                                                                                                                                                                                                                                                                                                                                                                                                                                                                                                                                                                                                                                                                                         |
| <i>-fasting glucose</i>                                                                                 |                                                                                                                                                                                                                                                                                                                                                                                                                                                                                                                                                                                                                                                                                                                                                                                                                                                                                                                                                                         |
| <i>-1h and 2h OGTT glucose</i>                                                                          |                                                                                                                                                                                                                                                                                                                                                                                                                                                                                                                                                                                                                                                                                                                                                                                                                                                                                                                                                                         |
| <i>-insulin secretion</i>                                                                               |                                                                                                                                                                                                                                                                                                                                                                                                                                                                                                                                                                                                                                                                                                                                                                                                                                                                                                                                                                         |
| <i>-insulin sensitivity</i>                                                                             |                                                                                                                                                                                                                                                                                                                                                                                                                                                                                                                                                                                                                                                                                                                                                                                                                                                                                                                                                                         |
| <i>-insulin resistance</i>                                                                              |                                                                                                                                                                                                                                                                                                                                                                                                                                                                                                                                                                                                                                                                                                                                                                                                                                                                                                                                                                         |
| <i>-beta-cell function (during pregnancy or postpartum)</i>                                             |                                                                                                                                                                                                                                                                                                                                                                                                                                                                                                                                                                                                                                                                                                                                                                                                                                                                                                                                                                         |
| <i>Gestational weight gain</i>                                                                          |                                                                                                                                                                                                                                                                                                                                                                                                                                                                                                                                                                                                                                                                                                                                                                                                                                                                                                                                                                         |
| <i>Obesity</i>                                                                                          |                                                                                                                                                                                                                                                                                                                                                                                                                                                                                                                                                                                                                                                                                                                                                                                                                                                                                                                                                                         |
| <i>Postpartum weight change</i>                                                                         |                                                                                                                                                                                                                                                                                                                                                                                                                                                                                                                                                                                                                                                                                                                                                                                                                                                                                                                                                                         |
| <i>Polycystic ovary syndrome</i>                                                                        |                                                                                                                                                                                                                                                                                                                                                                                                                                                                                                                                                                                                                                                                                                                                                                                                                                                                                                                                                                         |
| <i>Lipid profile (total cholesterol, HDL and LDL cholesterol, triglycerides)</i>                        |                                                                                                                                                                                                                                                                                                                                                                                                                                                                                                                                                                                                                                                                                                                                                                                                                                                                                                                                                                         |
| <b>Key infant metabolic outcome(s)* of interest</b>                                                     | Key infant outcomes assessed (from list)                                                                                                                                                                                                                                                                                                                                                                                                                                                                                                                                                                                                                                                                                                                                                                                                                                                                                                                                |
| <i>Birthweight (absolute/ centiles)</i>                                                                 |                                                                                                                                                                                                                                                                                                                                                                                                                                                                                                                                                                                                                                                                                                                                                                                                                                                                                                                                                                         |

|                                 |                                                                                                           |
|---------------------------------|-----------------------------------------------------------------------------------------------------------|
| <i>Macrosomia</i>               | Relationship of said outcome to hPL/PRL levels (as t-test result, odds ratio, regression coefficient etc) |
| <i>Growth restriction</i>       | - Unadjusted                                                                                              |
| <i>Placental mass</i>           | - After adjustment (with list of covariates included in model/s)                                          |
| Conclusions regarding the above |                                                                                                           |

\*Due to the likely bidirectional nature of the lactogenic hormone/ maternal metabolism relationship, some studies will consider hPL/PRL as 'exposure' and a metabolic parameter (e.g. postpartum glucose tolerance) as 'outcome'. Others may consider a metabolic parameter (e.g. maternal pre-gestational DM) as 'exposure' with hPL/PRL levels during pregnancy, in comparison to healthy controls, as 'outcome'. The extraction template will accommodate both.

Abbreviations: hPL, human placental lactogen; PRL, prolactin; BMI, body mass index; T1DM, type 1 diabetes mellitus; T2DM, type 2 diabetes mellitus; OGTT, oral glucose tolerance test; HDL, high density lipoprotein; LDL, low density lipoprotein

## STATISTICAL ANALYSIS

Analysis for the two lactogenic hormones of interest, hPL and PRL, will be undertaken separately. Key exposure / outcome associations for each hormone will be determined based on the number of studies available. It is anticipated that hPL will be analysed primarily in relation to maternal metabolic / glycaemic status during pregnancy, and to fetal outcomes (birthweight, macrosomia, growth restriction, placental mass). For PRL, it is anticipated that key outcomes will be maternal metabolic / glycaemic status and related maternal metabolic indices (measures of insulin secretion, sensitivity and beta-cell function) both during pregnancy and postpartum. After data extraction, the reviewers will determine whether meta-analysis is appropriate (based on the number of studies for each hormone/outcome relationship and the heterogeneity of their designs and participant groups). If meta-analysis is possible, Review Manager statistical software will be used for analysis with random effects models employed to generate weighted mean differences. Statistical heterogeneity will be assessed using the  $I^2$  test, with  $I^2$  values  $> 50\%$  indicating moderate to high heterogeneity. Sensitivity analyses will be performed where applicable to explore the effects of studies with high risk of bias on the overall results. Subgroup analyses will also be performed where possible (for example; by type of diabetes). Where a meta-analysis is not possible, a narrative synthesis of results will be performed.



1  
2  
3 Data will be presented in summary tables and in narrative format to describe the populations,  
4 exposures and key outcomes of the included studies. Forest plots and funnel plots will be used  
5  
6 to present results from meta-analyses (where applicable) and publication bias assessments,  
7  
8 respectively. Meta-analysis results will be reported according to PRISMA guidelines [24].  
9  
10  
11

## 12 13 ETHICS AND DISSEMINATION

14  
15  
16 This project will collate aggregate data from published studies (or aggregate data provided by  
17 study investigators upon request), and thus ethical approval will not be required.  
18  
19

20  
21 Findings will be disseminated via publications in peer-reviewed journals and presentations at  
22 scientific meetings. If deemed appropriate, findings will also be communicated to relevant  
23 stakeholders to guide clinical practice and public health actions in this area.  
24  
25  
26  
27

## 28 29 DATA AVAILABILITY STATEMENT

30  
31 No data have been generated or analysed in this manuscript.  
32  
33

## 34 35 PATIENT AND PUBLIC INVOLVEMENT STATEMENT

36  
37 It was not feasible or appropriate to involve patients or members of the public in the design,  
38 planning or conduct of the planned research.  
39  
40  
41

## 42 43 DISCUSSION

44  
45 The proposed review will be the first, to our knowledge, to systematically collate and  
46 synthesise the existing scientific literature linking two key lactogenic hormones, hPL and PRL,  
47 to maternal metabolic health in pregnancy and postpartum (and, by extension, to infant  
48 outcomes). Systematic reviews which evaluate biomarkers or aim to explore physiological  
49 questions are rare in the endocrine literature, and represent an under-utilised opportunity to  
50 move beyond subjective, narrative work towards inclusive, extensive reviews with the potential  
51 for objective and evidence-based conclusions.  
52  
53  
54  
55  
56  
57  
58  
59  
60

1  
2  
3 Whilst these hormones have long been recognised for their roles in the antenatal preparation of  
4 the breast for lactation and (in the case of PRL) for the postnatal initiation and maintenance of  
5 lactation, their metabolic roles have been relatively under-appreciated. Both hormones  
6 contribute to the insulin resistance associated with the pregnant state, but also potentially have  
7 central roles in the adaptation of the maternal pancreas during gestation, stimulating beta-cell  
8 adaptation and increasing beta-cell mass and insulin secretion [1, 9]. During a normal  
9 pregnancy, this may allow compensation for pregnancy-induced insulin resistance, resulting in  
10 overall maintenance of euglycaemia.  
11  
12  
13  
14  
15  
16  
17  
18  
19  
20  
21

22 Despite likely playing a key role in the regulation of glucose and insulin dynamics during  
23 pregnancy, the relationship between hPL levels and the pathophysiology of GDM remains  
24 unclear. Several studies have investigated possible links, with some reporting no association  
25 between maternal hPL levels and GDM status [28-30] and others reporting higher hPL in GDM  
26 subjects than controls [31-33], particularly if insulin-treated [34]. For hPL levels during  
27 pregnancies affected by pre-existing diabetes (T1DM/ T2DM), the majority of authors report  
28 serially-higher hPL throughout gestation in diabetic women compared with controls [29, 31,  
29 35-37], although other studies in T1DM have shown lower levels in the setting of poor control  
30 [38].  
31  
32  
33  
34  
35  
36  
37  
38  
39  
40  
41  
42

43 Importantly however, this area of the literature is particularly dated, with many studies  
44 performed well prior to the 21<sup>st</sup> century and prior to contemporary diagnostic definitions of  
45 diabetes in pregnancy. As such, the exact type of maternal diabetes among study participants  
46 is often unclear (they are simply deemed to be ‘diabetic’, are defined according to the now-  
47 historical White’s Classification of diabetes in pregnancy [39], or are termed ‘insulin-  
48 dependent’) [31, 32, 35-38]. Such studies provide valuable basic insights into the  
49 pathophysiology of the lactogen/maternal metabolism relationship, but comparison to the  
50 available better-described contemporary cohorts [28] will present challenges. Furthermore,  
51 higher hPL levels are clearly related to increased placental weight and macrosomia, and several  
52  
53  
54  
55  
56  
57  
58  
59  
60

1  
2  
3 authors have suggested that increased levels of hPL in many diabetic pregnancies may simply  
4 reflect higher placental mass [31, 35]. This does not suggest it is aetiologically unimportant,  
5  
6 however – it is possible that the placentomegaly seen in maternal diabetes causes higher hPL  
7  
8 levels, stimulating maternal and fetal beta-cell expansion and increasing fetal insulin  
9  
10 production, thus promoting glycogenesis, fat deposition and further fetal growth [6].  
11  
12  
13  
14

15 Acknowledging these challenges, a better understanding of the role of hPL in metabolically-  
16  
17 abnormal pregnancies has potential clinical application. For example, accurate antenatal  
18  
19 prediction of fetal macrosomia remains challenging, and current macrosomia prediction  
20  
21 strategies (including physical examination and ultrasound assessment) are both resource-  
22  
23 intensive and imprecise. There is thus a clear requirement for maternal serum biomarkers in  
24  
25 improving antenatal macrosomia prediction, particularly in women at high risk of the outcome  
26  
27 (such as those with pre-gestational diabetes or GDM). Whilst several candidate maternal  
28  
29 biomarkers have been assessed for their association with birthweight or macrosomia (both in  
30  
31 diabetic and non-diabetic pregnancies), evidence is mixed and uncertainties around clinical  
32  
33 utility persist [40]. hPL has recently been largely overlooked as a candidate biomarker in this  
34  
35 capacity, but previous work suggests it may have significant potential if revisited. For instance,  
36  
37 one 1998 study measured hPL at the time of GDM screening (n=257) and found that among  
38  
39 the subset of women with a normal glucose challenge test but whose infants ultimately weighed  
40  
41 >4000 g (n=11), mean hPL at the time of testing had in fact been similar to the mean hPL found  
42  
43 in women with GDM [41]. This suggests that hPL may warrant evaluation as a biomarker for  
44  
45 macrosomia prediction, both in women with diagnosed diabetes and those without.  
46  
47  
48  
49  
50  
51

52 Unlike hPL (which, as a placentally-derived hormone, is washed from the circulation following  
53  
54 delivery), PRL has probable influence in maternal metabolism both during pregnancy and  
55  
56 postpartum, particularly if lactation ensues. The literature here is similarly conflicting. For  
57  
58 example, maternal serum PRL levels during GDM pregnancy have been examined by several  
59  
60 groups, with the majority reporting similar levels to normal pregnancies [28, 30, 42]. However,

1  
2  
3 two more recent studies have directly contradicted this, finding that higher PRL levels in the  
4 first [43] and third [44] trimester of pregnancy were associated with reduced glucose tolerance  
5 on OGTT, with both groups suggesting that PRL may be independently involved in GDM  
6 pathogenesis.  
7  
8  
9  
10  
11

12  
13 Postpartum, lactation (under the chief control of PRL) appears to confer maternal metabolic  
14 benefits, but the mechanism by which this occurs is unclear. One group found that maternal  
15 serum PRL in late pregnancy was significantly higher in women who progressed to normal  
16 glucose tolerance postpartum than in those who progressed to postpartum prediabetes/ diabetes;  
17 and that higher antepartum PRL independently predicted improved postpartum insulin  
18 secretion capacity [28]. That group suggested that these findings may reflect a postpartum  
19 extension of the beneficial effects of PRL on beta-cell mass and islet adaptation that are thought  
20 to occur during gestation. Another group, who measured PRL postpartum, presented different  
21 findings and discussion: women with higher circulating PRL in the context of lactation in their  
22 study had reduced beta-cell function and lower insulin secretion indices; but were less insulin  
23 resistant [18]. Authors have suggested that this improvement in insulin resistance may result  
24 from the mobilisation of muscle and liver lipids into breast milk under the control of PRL [4],  
25 an action that may be particularly beneficial in women who are insulin resistant at baseline  
26 (women with recent GDM are known to have increased intramyocellular lipid content, IMCL,  
27 at 4-6 months post-delivery compared with controls) [45].  
28  
29  
30  
31  
32  
33  
34  
35  
36  
37  
38  
39  
40  
41  
42  
43  
44  
45  
46  
47

48 There is thus a clear need for a systematic review of the literature in this field – both lactogenic  
49 hormones clearly have central roles in the regulation of maternal metabolism (both during  
50 pregnancy and postpartum, and for women with normal and abnormal pregnancies). However,  
51 to date the evidence has not, to our knowledge, been effectively synthesised.  
52  
53  
54  
55  
56  
57

58 Some limitations of the review process should be noted. Firstly, owing to the intentionally-  
59 broad scope of the review, included studies will be heterogeneous in their design, methodology  
60

1  
2  
3 and research questions. In the analysis phase, hPL and PRL will thus be considered separately  
4  
5 and studies will be grouped according to similar outcomes; but it is possible that marked  
6  
7 heterogeneity will preclude meaningful conclusions and statistical meta-analysis. Secondly,  
8  
9 some of the basic clinical work on hPL and PRL levels in normal and diabetic pregnancies is  
10  
11 now very dated, extending back to the 1970s and 1980s. Whilst robust and worthy of inclusion,  
12  
13 differences in experimental design and (in particular) the classification and treatment of  
14  
15 maternal diabetes will present challenges when comparing such studies to modern cohorts. If  
16  
17 this proves problematic, we will endeavour to conduct a subgroup analysis by publication year  
18  
19 range or otherwise perform a narrative comparison between older and newer studies. Thirdly,  
20  
21 as previously described, the relationship between lactogenic hormones and maternal  
22  
23 metabolism is almost certainly bidirectional, whereby some studies examine the effects of  
24  
25 lactogenic hormones (exposure) on metabolic conditions (outcome), whilst in others, exposure  
26  
27 and outcome are reversed. The review is designed to capture both, but – particularly in the  
28  
29 postpartum context – the bidirectional nature of the relationship can bias observational studies.  
30  
31 While this cannot be directly addressed in our review methodology, it will be acknowledged in  
32  
33 the synthesis and interpretation of the findings.  
34  
35  
36  
37  
38  
39

## 40 **CONCLUSION**

41  
42  
43 In summary, this systematic review will rigorously and systematically collate and synthesise  
44  
45 current evidence linking the key lactogenic hormones hPL and PRL to maternal metabolic  
46  
47 health in pregnancy and postpartum (and thus to related infant outcomes). Both hormones have  
48  
49 key roles in the maintenance of glucose homeostasis during pregnancy, including direct actions  
50  
51 on the beta-cells of the maternal endocrine pancreas. However, the exact roles of these  
52  
53 hormones – particularly in metabolically abnormal pregnancies – remain unclear, and evidence  
54  
55 is conflicting. Further, hPL may have untapped potential clinical application in the antenatal  
56  
57 prediction of macrosomia, while the hormonal control of lactation, led by PRL, may regulate  
58  
59 glucose and lipid metabolism and help to guard postpartum women against persistent  
60

1  
2  
3 dysglycaemia. Through this review process, the available scientific evidence will be  
4 synthesised to clarify these relationships and inform future research and practice in the field of  
5  
6 maternal metabolic and endocrine health.  
7  
8  
9

10 **Author contributions:** KR is the project lead, conceptualised and designed the protocol,  
11 wrote the first draft of the manuscript, and will coordinate and conduct the systematic review  
12 process along with co-reviewer RG. AMM has contributed to the design of the search strategy  
13 and will provide support with evidence synthesis. AM, AMM, AJ, and HJT reviewed and  
14 edited the manuscript, and AM, AJ, and HJT will provide oversight and supervision for the  
15 systematic review process. All authors contributed substantial intellectual input to the  
16 manuscript in line with ICMJE criteria for authorship and have approved the final version for  
17 publication.  
18  
19  
20  
21  
22  
23  
24  
25  
26  
27  
28  
29

30 **Funding statement:** This research received no specific grant from any funding agency in  
31 the public, commercial or not-for-profit sectors.  
32  
33  
34

35 **Competing interests:** All authors declare no conflicts of interest.  
36  
37

38 **Patient consent for publication:** Not required.  
39  
40

41 **Licensing Statement:** I, the Submitting Author has the right to grant and does grant on  
42 behalf of all authors of the Work (as defined in the below author licence), an exclusive  
43 licence and/or a non-exclusive licence for contributions from authors who are: i) UK Crown  
44 employees; ii) where BMJ has agreed a CC-BY licence shall apply, and/or iii) in accordance  
45 with the terms applicable for US Federal Government officers or employees acting as part of  
46 their official duties; on a worldwide, perpetual, irrevocable, royalty-free basis to BMJ  
47 Publishing Group Ltd ("BMJ") its licensees and where the relevant Journal is co-owned by  
48 BMJ to the co-owners of the Journal, to publish the Work in BMJ Open and any other BMJ  
49 products and to exploit all rights, as set out in our [licence](#).  
50  
51  
52  
53  
54  
55  
56  
57  
58  
59  
60

1  
2  
3 The Submitting Author accepts and understands that any supply made under these terms is  
4 made by BMJ to the Submitting Author unless you are acting as an employee on behalf of  
5 your employer or a postgraduate student of an affiliated institution which is paying any  
6 applicable article publishing charge (“APC”) for Open Access articles. Where the Submitting  
7 Author wishes to make the Work available on an Open Access basis (and intends to pay the  
8 relevant APC), the terms of reuse of such Open Access shall be governed by a Creative  
9 Commons licence – details of these licences and which Creative Commons licence will apply  
10 to this Work are set out in our licence referred to above.  
11  
12  
13  
14  
15  
16  
17  
18  
19  
20  
21  
22  
23  
24  
25  
26  
27  
28  
29  
30  
31  
32  
33  
34  
35  
36  
37  
38  
39  
40  
41  
42  
43  
44  
45  
46  
47  
48  
49  
50  
51  
52  
53  
54  
55  
56  
57  
58  
59  
60

## REFERENCES

1. Simpson, S., L. Smith, and J. Bowe, *Placental peptides regulating islet adaptation to pregnancy: clinical potential in gestational diabetes mellitus*. *Curr Opin Pharmacol*, 2018. **43**: p. 59-65.
2. Bilous, R.W., et al., *Resolving the Gestational Diabetes Diagnosis Conundrum: The Need for a Randomized Controlled Trial of Treatment*. *Diabetes Care*, 2021. **44**(4): p. 858-864.
3. Plows, J.F., et al., *The Pathophysiology of Gestational Diabetes Mellitus*. *Int J Mol Sci*, 2018. **19**(11).

- 1
- 2
- 3
4. Ramos-Roman, M.A., *Prolactin and lactation as modifiers of diabetes risk in gestational diabetes*. *Horm Metab Res*, 2011. **43**(9): p. 593-600.
5. Handwerger, S. and M. Freemerk, *Role of Placental Lactogen and Prolactin in Human Pregnancy*, in *Regulation of Ovarian and Testicular Function*, V.B. Mahesh, et al., Editors. 1987, Springer US: Boston, MA. p. 399-420.
6. Newbern, D. and M. Freemerk, *Placental hormones and the control of maternal metabolism and fetal growth*. *Curr Opin Endocrinol Diabetes Obes*, 2011. **18**(6): p. 409-16.
7. Sorenson, R.L. and T.C. Brelje, *Adaptation of islets of Langerhans to pregnancy: beta-cell growth, enhanced insulin secretion and the role of lactogenic hormones*. *Horm Metab Res*, 1997. **29**(6): p. 301-7.
8. Parsons, J.A., T.C. Brelje, and R.L. Sorenson, *Adaptation of islets of Langerhans to pregnancy: increased islet cell proliferation and insulin secretion correlates with the onset of placental lactogen secretion*. *Endocrinology*, 1992. **130**(3): p. 1459-66.
9. Brelje, T.C., et al., *Effect of homologous placental lactogens, prolactins, and growth hormones on islet B-cell division and insulin secretion in rat, mouse, and human islets: implication for placental lactogen regulation of islet function during pregnancy*. *Endocrinology*, 1993. **132**(2): p. 879-887.
10. Palomba, S. and J. Daolio, *Pregnancy Endocrinology* ☆, in *Encyclopedia of Endocrine Diseases (Second Edition)*, I. Huhtaniemi and L. Martini, Editors. 2018, Academic Press: Oxford. p. 408-417.
11. Freemerk, M., *Regulation of Maternal Metabolism by Pituitary and Placental Hormones: Roles in Fetal Development and Metabolic Programming*. *Hormone Research in Paediatrics*, 2006. **65**(suppl 3)(Suppl. 3): p. 41-49.
12. Sibiak, R., et al., *Placental Lactogen as a Marker of Maternal Obesity, Diabetes, and Fetal Growth Abnormalities: Current Knowledge and Clinical Perspectives*. *Journal of Clinical Medicine*, 2020. **9**(4): p. 1142.
13. Yavuz, D., et al., *Endothelial function, insulin sensitivity and inflammatory markers in hyperprolactinemic pre-menopausal women*. *Eur J Endocrinol*, 2003. **149**(3): p. 187-93.
14. Banerjee, R.R., et al., *Gestational Diabetes Mellitus From Inactivation of Prolactin Receptor and MafB in Islet beta-Cells*. *Diabetes*, 2016. **65**(8): p. 2331-41.
15. Nteeba, J., et al., *Pancreatic prolactin receptor signaling regulates maternal glucose homeostasis*. *Journal of endocrinology*, 2019. **241**(1): p. 71-83.
16. Stuebe, A.M., et al., *Duration of lactation and incidence of type 2 diabetes*. *Jama*, 2005. **294**(20): p. 2601-10.
17. Feng, L., et al., *Lactation and progression to type 2 diabetes in patients with gestational diabetes mellitus: A systematic review and meta-analysis of cohort studies*. *J Diabetes Investig*, 2018. **9**(6): p. 1360-1369.
18. Harreiter, J., et al., *Decreased beta-cell function in breastfeeding obese and non-obese women: A prospective observational study*. *Clinical Nutrition*, 2019. **38**(6): p. 2790-2798.
19. Retnakaran, R., et al., *Maternal Serum Prolactin and Prediction of Postpartum  $\beta$ -Cell Function and Risk of Prediabetes/Diabetes*. *Diabetes Care*, 2016. **39**(7): p. 1250-8.
20. Winkvist, A., et al., *Maternal Prepregnant Body Mass Index and Gestational Weight Gain Are Associated with Initiation and Duration of Breastfeeding among Norwegian Mothers*. *J Nutr*, 2015. **145**(6): p. 1263-70.
21. De Bortoli, J. and L.H. Amir, *Is onset of lactation delayed in women with diabetes in pregnancy? A systematic review*. *Diabet Med*, 2016. **33**(1): p. 17-24.
22. Rasmussen, K.M. and C.L. Kjolhede, *Prepregnant overweight and obesity diminish the prolactin response to suckling in the first week postpartum*. *Pediatrics*, 2004. **113**(5): p. e465-71.



23. Nommsen-Rivers, L.A., *Does Insulin Explain the Relation between Maternal Obesity and Poor Lactation Outcomes? An Overview of the Literature*. Advances in nutrition (Bethesda, Md.), 2016. **7**(2): p. 407-414.
24. Page, M.J., et al., *The PRISMA 2020 statement: an updated guideline for reporting systematic reviews*. BMJ, 2021. **372**: p. n71.
25. Moher, D., et al., *Preferred reporting items for systematic review and meta-analysis protocols (PRISMA-P) 2015 statement*. Syst Rev, 2015. **4**(1): p. 1.
26. Schardt, C., et al., *Utilization of the PICO framework to improve searching PubMed for clinical questions*. BMC Med Inform Decis Mak, 2007. **7**: p. 16.
27. MCHRI, *Evidence Synthesis Program templates for critical appraisal and risk of bias (adapted from Critical Appraisal Templates, Centre for Clinical Effectiveness, Southern Health, Melbourne 2010)*. Monash University and Monash Health, 2013.
28. Retnakaran, R., et al., *Evaluation of Circulating Determinants of Beta-Cell Function in Women With and Without Gestational Diabetes*. J Clin Endocrinol Metab, 2016. **101**(7): p. 2683-91.
29. Ngala, R.A., et al., *Placental peptides metabolism and maternal factors as predictors of risk of gestational diabetes in pregnant women. A case-control study*. PLoS One, 2017. **12**(7): p. e0181613.
30. Catalano, P.M., et al., *Downregulated IRS-1 and PPARgamma in obese women with gestational diabetes: relationship to FFA during pregnancy*. American journal of physiology., 2002. **282**(3): p. E522-E533.
31. Lopez-Espinoza, I., et al., *High levels of growth hormone and human placental lactogen in pregnancy complicated by diabetes*. Diabetes Res, 1986. **3**(3): p. 119-25.
32. Lolis, D., V. Tzingounis, and D. Kaskarelis, *Maternal serums and amniotic fluid levels of human placental lactogen in gestational diabetes*. European journal of clinical investigation., 1978. **8**(4): p. 259-260.
33. Caufriez, A., et al., *Regulation of maternal IGF-I by placental GH in normal and abnormal human pregnancies*. American journal of physiology., 1993. **265**(4 Pt 1): p. E572-E577.
34. Muralimanoharan, S., A. Maloyan, and L. Myatt, *Mitochondrial function and glucose metabolism in the placenta with gestational diabetes mellitus: role of miR-143*. Clinical Science, 2016. **130**(11): p. 931-941.
35. Ursell, W., M. Brudenell, and T. Chard, *Placental Lactogen Levels in Diabetic Pregnancy*. British Medical Journal, 1973. **2**(5858): p. 80-82.
36. Soler, N.G., H.O. Nicholson, and J.M. Malins, *Serial determinations of human placental lactogen in the management of diabetic pregnancy*. Lancet, 1975. **2**(7924): p. 54-7.
37. Selenkow, H.A., et al., *Patterns of serum immunoreactive human placental lactogen (IR-HPL) and chorionic gonadotropin (IR-HCG) in diabetic pregnancy*. Diabetes, 1971. **20**(10): p. 696-706.
38. Botta, R.M., et al., *Placental lactogen, progesterone, total estriol and prolactin plasma levels in pregnant women with insulin-dependent diabetes mellitus*. European journal of obstetrics, gynecology and reproductive biology., 1984. **16**(6): p. 393-401.
39. Sacks, D.A. and B.E. Metzger, *Classification of diabetes in pregnancy: time to reassess the alphabet*. Obstetrics and gynecology, 2013. **121**(2 Pt 1): p. 345-348.
40. Nahavandi, S., et al., *Biomarkers for Macrosomia Prediction in Pregnancies Affected by Diabetes*. Frontiers in Endocrinology, 2018. **9**(407).
41. Henderson, C.E. and M.Y. Divon, *Combining human placental lactogen with routine glucose challenge tests*. Prim Care Update Ob Gyns, 1998. **5**(4): p. 189-190.
42. Skouby, S.O., et al., *Prolactin and glucose tolerance in normal and gestational diabetic pregnancy*. Obstet Gynecol, 1986. **67**(1): p. 17-20.

- 1  
2  
3 43. Li, M., et al., *Plasma Prolactin and Progesterone Levels and the Risk of Gestational*  
4 *Diabetes: A Prospective and Longitudinal Study in a Multiracial Cohort*. Front  
5 *Endocrinol (Lausanne)*, 2020. **11**: p. 83.  
6  
7 44. Ekinci, E.I., et al., *Higher maternal serum prolactin levels are associated with*  
8 *reduced glucose tolerance during pregnancy*. *J Diabetes Investig*, 2017. **8**(5): p. 697-  
9 700.  
10 45. Kautzky-Willer, A., et al., *Increased intramyocellular lipid concentration identifies*  
11 *impaired glucose metabolism in women with previous gestational diabetes*. *Diabetes*,  
12 2003. **52**(2): p. 244-51.  
13  
14  
15  
16  
17  
18  
19  
20  
21  
22  
23  
24  
25  
26  
27  
28  
29  
30  
31  
32  
33  
34  
35  
36  
37  
38  
39  
40  
41  
42  
43  
44  
45  
46  
47  
48  
49  
50  
51  
52  
53  
54  
55  
56  
57  
58  
59  
60

For peer review only

Ovid MEDLINE(R) and Epub Ahead of Print, In-Process, In-Data-Review & Other Non-Indexed Citations, Daily and Versions(R) <1946 to current>

- 1 (pregnan\* or gestation\* or post?partum or post-partum or lactat\* or breastfe\*).ti,ab.
- 2 exp pregnancy/
- 3 postpartum period/
- 4 lactation/
- 5 Breast Feeding/
- 6 1 or 2 or 3 or 4 or 5
- 7 prolactin.ti,ab.
- 8 prolactin/
- 9 placenta\* lactogen\*.ti,ab.
- 10 placental lactogen/
- 11 somato-mammotropin.ti,ab.
- 12 somato?mammotropin.ti,ab.
- 13 7 or 8 or 9 or 10 or 11 or 12
- 14 ((pregnan\* or gestation\* or matern\* or post?partum or post-partum or birth or f?etal or baby or infant\* or newborn\* or neonat\*) adj1 weight\*).ti,ab.
- 15 (placenta\* adj1 weight\*).ti,ab.
- 16 (placenta\* adj1 mass\*).ti,ab.
- 17 (diabet\* or glucose or obes\* or metabolic).ti,ab.
- 18 polycystic ovar\*.ti,ab.
- 19 exp diabetes mellitus/
- 20 glucose intolerance/
- 21 exp diabetes, gestational/
- 22 obesity, maternal/
- 23 birth weight/
- 24 fetal weight/
- 25 polycystic ovary syndrome/
- 26 pregnancy outcome/
- 27 14 or 15 or 16 or 17 or 18 or 19 or 20 or 21 or 22 or 23 or 24 or 25 or 26
- 28 6 and 13 and 27
- 29 exp animals/ not humans.sh.
- 30 28 not 29

Embase Classic+Embase <1947 to current>

- 1 (pregnan\* or gestation\* or post?partum or post-partum or lactat\* or breastfe\*).ti,ab.
- 2 exp pregnancy/
- 3 lactation/
- 4 breast feeding/
- 5 1 or 2 or 3 or 4
- 6 prolactin.ti,ab.
- 7 prolactin/
- 8 placenta\* lactogen\*.ti,ab.
- 9 placenta lactogen/
- 10 somato-mammotropin.ti,ab.
- 11 somato?mammotropin.ti,ab.
- 12 6 or 7 or 8 or 9 or 10 or 11
- 13 ((pregnan\* or gestation\* or matern\* or post?partum or post-partum or birth or f?etal or baby or infant\* or newborn\* or neonat\*) adj1 weight\*).ti,ab.
- 14 (placenta\* adj1 weight\*).ti,ab.
- 15 (placenta\* adj1 mass\*).ti,ab.
- 16 (diabet\* or glucose or obes\* or metabolic).ti,ab.
- 17 polycystic ovar\*.ti,ab.
- 18 exp diabetes mellitus/
- 19 glucose intolerance/
- 20 pregnancy diabetes mellitus/
- 21 maternal obesity/
- 22 birth weight/
- 23 fetus weight/
- 24 ovary polycystic disease/
- 25 pregnancy outcome/
- 26 13 or 14 or 15 or 16 or 17 or 18 or 19 or 20 or 21 or 22 or 23 or 24 or 25
- 27 5 and 12 and 26
- 28 (exp animal/ or exp invertebrate/ or nonhuman/ or animal experiment/ or animal tissue/ or animal model/ or exp plant/ or exp fungus/) not (exp human/ or human tissue/)
- 29 27 not 28

## CINAHL PLUS

- 1  
2  
3  
4  
5 S26 S6 AND S12 AND S25  
6  
7 S13 OR S14 OR S15 OR S16 OR S17 OR S18 OR S19 OR S20 OR S21 OR S22 OR S23  
8 S25 OR S24  
9  
10 S24 (MH "Pregnancy Outcomes")  
11  
12 S23 (MH "Polycystic Ovary Syndrome")  
13  
14 S22 (MH "Fetal Weight")  
15  
16 S21 (MH "Birth Weight")  
17  
18 S20 (MH "Obesity, Maternal")  
19  
20 S19 (MH "Diabetes Mellitus, Gestational")  
21  
22 S18 (MH "Glucose Intolerance")  
23  
24 S17 (MH "Diabetes Mellitus+")  
25  
26 S16 polycystic ovar\*  
27  
28 S15 diabet\* or glucose or obes\* or metabolic  
29  
30 S14 placenta\* N1 (weight\* OR mass\*)  
31 (pregnan\* or gestation\* or matern\* or post?partum or postpartum or birth or f?etal or baby  
32 or infant\* or newborn\* or neonat\*) N1 weight\*  
33  
34 S12 S7 OR S8 OR S9 OR S10 OR S11  
35  
36 S11 somatomammotropin  
37  
38 S10 (MH "Placental Hormones")  
39  
40 S9 "placenta\* lactogen\*"  
41  
42 S8 (MH "Prolactin")  
43  
44 S7 prolactin  
45  
46 S6 S1 OR S2 OR S3 OR S4 OR S5  
47  
48 S5 (MH "Breast Feeding")  
49  
50 S4 (MH "Lactation")  
51  
52 S3 (MH "Postnatal Period+")  
53  
54 S2 (MH "Pregnancy+")  
55  
56 S1 pregnan\* or gestation\* or post?partum or postpartum or lactat\* or breastfe\*

**Template for critical appraisal of a cohort study**

Document evidence from the article in quotation marks.

|                                                                                                          |                                                                                                                                                                                                                                   |                                                                                                                                                                                                                                             |
|----------------------------------------------------------------------------------------------------------|-----------------------------------------------------------------------------------------------------------------------------------------------------------------------------------------------------------------------------------|---------------------------------------------------------------------------------------------------------------------------------------------------------------------------------------------------------------------------------------------|
| <b>Study ID</b>                                                                                          |                                                                                                                                                                                                                                   |                                                                                                                                                                                                                                             |
| <b>Study citation</b>                                                                                    |                                                                                                                                                                                                                                   |                                                                                                                                                                                                                                             |
| <b>EXTERNAL VALIDITY – IS THIS STUDY AND ITS RESULTS GENERALIZABLE TO MY SYSTEMATIC REVIEW QUESTION?</b> |                                                                                                                                                                                                                                   |                                                                                                                                                                                                                                             |
| <b>Patient/population/participants</b>                                                                   | Describe whether they were gender specific, had a particular condition or the general population, age and any other relevant characteristics (e.g. BMI)                                                                           |                                                                                                                                                                                                                                             |
| <b>Control population (if appropriate)</b>                                                               | Describe whether they were gender specific, had a particular condition or the general population, age and any other relevant characteristics (e.g. BMI)                                                                           |                                                                                                                                                                                                                                             |
| <b>N</b>                                                                                                 | Where possible, list the number of participants that were: <ul style="list-style-type: none"> <li>• Screened</li> <li>• Enrolled</li> <li>• Allocated/randomised</li> <li>• Assessed</li> <li>• Followed up</li> </ul>            |                                                                                                                                                                                                                                             |
| <b>Setting</b>                                                                                           | List where the intervention was conducted and assessed ie. hospital, clinic, community and/or university setting.                                                                                                                 |                                                                                                                                                                                                                                             |
| <b>Intervention/indicator</b>                                                                            | Describe the intervention in as much detail as possible e.g. medication type, dose, duration, intervals.                                                                                                                          |                                                                                                                                                                                                                                             |
| <b>Comparison/control</b>                                                                                | Describe the comparison in as much detail as possible e.g. medication type, dose, duration, intervals.                                                                                                                            |                                                                                                                                                                                                                                             |
| <b>Outcomes</b>                                                                                          | List what the study measured (e.g. weight, BMI, HbA1c) as primary outcomes and secondary outcomes. If the outcomes are not relevant to your systematic review, list these as measured but not relevant to your systematic review. |                                                                                                                                                                                                                                             |
| <b>Does the study have a clearly focused question and/or PICO?</b>                                       | Yes<br>Partial<br>No<br>Not reported                                                                                                                                                                                              | Consider if the question is ‘focused’ in terms of: <ul style="list-style-type: none"> <li>– the population studied</li> <li>– the intervention given or exposure</li> <li>– the comparison(s)</li> <li>– the outcomes considered</li> </ul> |
| <b>Inclusion Criteria</b>                                                                                | Yes<br>No<br>Not reported                                                                                                                                                                                                         |                                                                                                                                                                                                                                             |
| <b>Exclusion Criteria</b>                                                                                | Yes<br>No<br>Not reported                                                                                                                                                                                                         |                                                                                                                                                                                                                                             |
| <b>If there were specified inclusion/ exclusion criteria, were these appropriate?</b>                    | Yes<br>Partial<br>No<br>N/A                                                                                                                                                                                                       | Consider if: <ul style="list-style-type: none"> <li>- the eligibility criteria used to specify the patients, interventions/ exposures and outcomes of interest.</li> </ul>                                                                  |
| <b>Is a cohort study the appropriate design to answer this question?</b>                                 | Yes<br>Partial<br>No                                                                                                                                                                                                              | Consider if a cohort study is a good way of answering the question under the circumstances.                                                                                                                                                 |
| <b>Were the outcomes measured appropriate?</b>                                                           | Yes<br>Partial<br>No<br>Not reported                                                                                                                                                                                              | Consider if the outcomes measured are appropriate and important outcome.                                                                                                                                                                    |
| <b>Was there sufficient duration of follow-up for outcomes to occur?</b>                                 | Yes<br>Partial<br>No<br>Not reported                                                                                                                                                                                              | May need to check with clinicians regarding what is sufficient duration for important events to occur.<br>An acceptable length of time should be decided before quality/risk of bias assessment begins.                                     |

| <b>INTERNAL VALIDITY – HAS THIS STUDY BEEN CONDUCTED RIGOROUSLY IN ORDER TO REDUCE BIAS?</b> |                                                                                                        |                                      |                                                                                                                                                                                                                                                                                                                                                                                                                                                                                                                                                                                                                                                                                                                                                                                                                                                                            |
|----------------------------------------------------------------------------------------------|--------------------------------------------------------------------------------------------------------|--------------------------------------|----------------------------------------------------------------------------------------------------------------------------------------------------------------------------------------------------------------------------------------------------------------------------------------------------------------------------------------------------------------------------------------------------------------------------------------------------------------------------------------------------------------------------------------------------------------------------------------------------------------------------------------------------------------------------------------------------------------------------------------------------------------------------------------------------------------------------------------------------------------------------|
| <b>SELECTION BIAS</b>                                                                        | <b>Other than the exposure under investigation, were the groups selected from similar populations?</b> | Yes<br>Partial<br>No<br>Not reported | Consider:<br>- whether the different sources would affect outcomes e.g. one group recruited from hospital(s) the other from the community.<br>- time periods i.e. historical cohort<br>- whether there is a large difference in participation rate between the two arms of the study.                                                                                                                                                                                                                                                                                                                                                                                                                                                                                                                                                                                      |
|                                                                                              | <b>Was the exposed cohort truly representative?</b>                                                    | Yes<br>Partial<br>No<br>Not reported | This item is assessing the representativeness of exposed individuals in the community relevant to the study's PICO, not the representativeness of the sample of individuals in the general population.<br>Consider:<br>- whether truly representative in the community (least bias)<br>- whether somewhat representative (some bias)<br>- whether selected group of users (bias)<br>- no description of the derivation of the cohort (most bias)                                                                                                                                                                                                                                                                                                                                                                                                                           |
|                                                                                              | <b>Is it clear that the outcome of interest was not present at the start of study?</b>                 | Yes<br>Partial<br>No<br>Not reported | In the case of mortality studies, outcome of interest is still the presence of a disease/ incident, rather than death. That is to say that a statement of no history of disease or incident is least biased.                                                                                                                                                                                                                                                                                                                                                                                                                                                                                                                                                                                                                                                               |
| <b>PERFORMAN<br/>CE BIAS</b>                                                                 | <b>Aside from the exposure, were the groups treated the same?</b>                                      | Yes<br>Partial<br>No<br>Not reported | To be sure it's the exposure which is responsible for the effect.                                                                                                                                                                                                                                                                                                                                                                                                                                                                                                                                                                                                                                                                                                                                                                                                          |
| <b>DETECTION BIAS</b>                                                                        | <b>Was exposure measured in a standard, valid and reliable way?</b>                                    | Yes<br>Partial<br>No<br>Not reported | Where exposure measures require any degree of subjectivity, some evidence should be provided that the measures used are reliable and have been validated prior to their use in the study.<br>Consider whether ascertainment of exposure was determined by:<br>- secure record (eg surgical records) (least bias)<br>- structured interview<br>- written self report (bias)<br>- no description (most bias)                                                                                                                                                                                                                                                                                                                                                                                                                                                                 |
|                                                                                              | <b>Were outcome assessors blind to the exposure?</b>                                                   | Yes<br>Partial<br>No<br>Not reported | Consider:<br>- If the outcome is objective (e.g. death) then blinding is less critical.<br>- If the outcome is subjective (e.g. symptoms or function) then blinding of the outcome assessor is critical.                                                                                                                                                                                                                                                                                                                                                                                                                                                                                                                                                                                                                                                                   |
|                                                                                              | <b>Were all outcomes measured in a standard, valid and reliable way?</b>                               | Yes<br>Partial<br>No<br>Not reported | Where outcome measures require any degree of subjectivity, some evidence should be provided that the measures used are reliable and have been validated prior to their use in the study.<br>For some outcomes (e.g. fractured hip), reference to the medical record is sufficient to satisfy the requirement for confirmation of the fracture. This would not be adequate for vertebral fracture outcomes where reference to x-rays would be required.<br>Consider whether outcomes were determined through:<br>- independent blind assessment or confirmation of the outcome by reference to secure records (x-rays, medical records, etc.) (least bias)<br>- record linkage (e.g. identified through codes on database records)<br>- self report (i.e. no reference to original medical records or x-rays to confirm the outcome) (bias)<br>- no description (most bias) |

|                                     |                                                                                                        |                                                           |                                                                                                                                                                                                                                                                                                                                                                                                                                                                                                                                                                                                                                |
|-------------------------------------|--------------------------------------------------------------------------------------------------------|-----------------------------------------------------------|--------------------------------------------------------------------------------------------------------------------------------------------------------------------------------------------------------------------------------------------------------------------------------------------------------------------------------------------------------------------------------------------------------------------------------------------------------------------------------------------------------------------------------------------------------------------------------------------------------------------------------|
|                                     | <b>Were outcomes assessed objectively and independently?</b>                                           | Yes<br>Partial<br>No<br>Not reported                      | Independence of assessment is important where the result of one outcome may effect the interpretation of another. When outcomes are objectively assessed, their independence from each other is less important.                                                                                                                                                                                                                                                                                                                                                                                                                |
| <b>ATTRITION BIAS</b>               | <b>What percentage of the individuals recruited into each arm of the study were lost to follow up?</b> | X% treatment<br>X% control/<br>comparison<br>Not reported | Consider:<br>- if all patients who entered the trial were properly accounted for and attributed at its conclusion.<br>- why patients dropped out, as well as how many.<br>- the drop out rate may be expected to be higher in studies conducted over a long period of time.<br>- if comparisons were made between participants followed-up and those lost to follow up, by exposure status.                                                                                                                                                                                                                                    |
|                                     | <b>What percentage of the individuals were not included in the analysis?</b>                           | X% treatment<br>X% control/<br>comparison<br>Not reported | Consider:<br>- if analysis was as per protocol or intention to treat<br>- number of crossovers<br>- reason for crossover                                                                                                                                                                                                                                                                                                                                                                                                                                                                                                       |
| <b>REPORT BIAS</b>                  | <b>Is the paper free of selective outcome reporting?</b>                                               | Yes<br>Partial<br>No<br>Not reported                      | Consider:<br>- if all the planned outcomes were measured<br>- if all the measured outcomes were reported<br>- if any additional or composite outcomes were measured.<br>This is difficult to determine if there isn't a protocol.                                                                                                                                                                                                                                                                                                                                                                                              |
| <b>CONFOUNDING</b>                  | <b>Are the cohorts comparable on the basis of design or analysis?</b>                                  | Yes<br>Partial<br>No<br>Not reported                      | Consider<br>- either exposed and non-exposed individuals must be matched in the design and/or confounders must be adjusted for in the analysis.<br>- statements of no differences between groups or that differences were not statistically significant are not sufficient for establishing comparability.<br>Note: If the relative risk for the exposure of interest is adjusted for the confounders listed, then the groups will be considered to be comparable on each variable used in the adjustment.                                                                                                                     |
| <b>OTHER INTERNAL VALIDITY/BIAS</b> | <b>Were there any conflicts of interest in the writing or funding of this study?</b>                   | Yes<br>No<br>Not reported                                 | Consider:<br>- if any of the authors are/were employed, sponsored etc by pharmaceutical companies, or have other financial/other ties<br>- if any commercial companies were involved in funding, writing, editing, data analysis or manuscript approval                                                                                                                                                                                                                                                                                                                                                                        |
|                                     | <b>Was the study sufficiently powered to detect any differences between the groups?</b>                | Yes<br>Partial<br>No<br>Not reported                      | Consider:<br>- if an adequate sample size calculation was undertaken<br>- if the required sample size recruited and retained<br>- for which outcomes the study was powered<br>- if confidence intervals include a clinically important difference, the study was underpowered<br>NB this is less important if significant differences were found.                                                                                                                                                                                                                                                                              |
|                                     | <b>If statistical analysis was undertaken, was this appropriate?</b>                                   | Yes<br>Partial<br>No<br>Not reported<br>N/A               | Consider:<br>- whether the authors performed any statistical tests or just presented figures<br>- if the statistical analysis was planned a priori<br>- if the data were analysed accordingly to the study protocol.<br>- the type of data and the statistical tests used. (Please refer to the CCE workbook as required)<br>- use of parametric versus non-parametric tests; whether the data has been checked for normality<br>- if the tests used are obscure, why did the authors used them and have they included a reference.<br>- if point estimates and measures of variability were presented for the primary outcome |



|                                          |                                                                                                           |                                                                                                                                                                                                                                                                                                                                                                                                                                                                                                                                                                                        |
|------------------------------------------|-----------------------------------------------------------------------------------------------------------|----------------------------------------------------------------------------------------------------------------------------------------------------------------------------------------------------------------------------------------------------------------------------------------------------------------------------------------------------------------------------------------------------------------------------------------------------------------------------------------------------------------------------------------------------------------------------------------|
|                                          |                                                                                                           | <ul style="list-style-type: none"> <li>- if subgroups were analysed appropriately</li> <li>- if potential confounders were identified and taken into account in the analysis</li> <li>- if there was any adjustment made for multiple testing</li> <li>- if missing data was handled appropriately</li> </ul>                                                                                                                                                                                                                                                                          |
| <b>Comments</b>                          | <i>Add any other relevant comments, including if this is likely to influence the results of the study</i> |                                                                                                                                                                                                                                                                                                                                                                                                                                                                                                                                                                                        |
| <b>What is the overall risk of bias?</b> | Low<br>Moderate<br>High<br>Insufficient information                                                       | <i>Low - All of the criteria have been fulfilled or where criteria have not been fulfilled it is very unlikely the conclusions of the study would be affected.</i><br><i>Moderate - Some of the criteria have been fulfilled and those criteria that have not been fulfilled may affect the conclusions of the study.</i><br><i>High - Few or no criteria fulfilled or the conclusions of the study are likely or very likely to be affected.</i><br><i>Insufficient information – not enough information provided on methodological quality to be able to determine risk of bias.</i> |

**Cited in full as:** Monash Centre for Health Research and Implementation (MCHRI) Evidence Synthesis Program template for critical appraisal of a cohort study (2014), MCHRI – Monash University and Monash Health, Melbourne, Australia (*adapted from* Critical Appraisal Templates (2010) Centre for Clinical Effectiveness, Southern Health, Melbourne, Australia AND Wells G, Shea B, O'Connell D, Peterson J, Welch V, Losos M, Tugwell P. The Newcastle–Ottawa Scale (NOS) for assessing the quality of nonrandomized studies in meta-analyses. In: Proceedings of the 3rd Symposium on Systematic Reviews Beyond the Basics: Improving Quality and Impact. Oxford; 2000. p. 3-5).

# Reporting checklist for protocol of a systematic review and meta analysis.

Based on the PRISMA-P guidelines.

|                     |                     |                                                                                                                                           | Page                |
|---------------------|---------------------|-------------------------------------------------------------------------------------------------------------------------------------------|---------------------|
|                     |                     | Reporting Item                                                                                                                            | Number              |
| <b>Title</b>        |                     |                                                                                                                                           |                     |
| Identification      | <a href="#">#1a</a> | Identify the report as a protocol of a systematic review                                                                                  | 1                   |
| Update              | <a href="#">#1b</a> | If the protocol is for an update of a previous systematic review, identify as such                                                        | n/a - not an update |
| <b>Registration</b> |                     |                                                                                                                                           |                     |
|                     | <a href="#">#2</a>  | If registered, provide the name of the registry (such as PROSPERO) and registration number                                                | 2                   |
| <b>Authors</b>      |                     |                                                                                                                                           |                     |
| Contact             | <a href="#">#3a</a> | Provide name, institutional affiliation, e-mail address of all protocol authors; provide physical mailing address of corresponding author | 1                   |
| Contribution        | <a href="#">#3b</a> | Describe contributions of protocol authors and identify the guarantor of the review                                                       | 20                  |
| <b>Amendments</b>   |                     |                                                                                                                                           |                     |

|    |                      |                                                               |          |
|----|----------------------|---------------------------------------------------------------|----------|
| 1  |                      |                                                               |          |
| 2  |                      |                                                               |          |
| 3  |                      |                                                               |          |
| 4  |                      |                                                               |          |
| 5  |                      |                                                               |          |
| 6  |                      |                                                               |          |
| 7  |                      |                                                               |          |
| 8  |                      |                                                               |          |
| 9  |                      |                                                               |          |
| 10 |                      |                                                               |          |
| 11 | <b>Support</b>       |                                                               |          |
| 12 |                      |                                                               |          |
| 13 |                      |                                                               |          |
| 14 | Sources              | <a href="#">#4</a>                                            | 9        |
| 15 |                      | If the protocol represents an amendment of a previously       |          |
| 16 |                      | completed or published protocol, identify as such and list    |          |
| 17 |                      | changes; otherwise, state plan for documenting important      |          |
| 18 |                      | protocol amendments                                           |          |
| 19 |                      |                                                               |          |
| 20 |                      |                                                               |          |
| 21 |                      |                                                               |          |
| 22 |                      |                                                               |          |
| 23 |                      |                                                               |          |
| 24 |                      |                                                               |          |
| 25 | Sources              | <a href="#">#5a</a>                                           | 20       |
| 26 |                      | Indicate sources of financial or other support for the review |          |
| 27 | Sponsor              | <a href="#">#5b</a>                                           | n/a - no |
| 28 |                      | Provide name for the review funder and / or sponsor           | specific |
| 29 |                      |                                                               | funding  |
| 30 |                      |                                                               |          |
| 31 |                      |                                                               |          |
| 32 |                      |                                                               |          |
| 33 | Role of sponsor or   | <a href="#">#5c</a>                                           | 20       |
| 34 | funder               | Describe roles of funder(s), sponsor(s), and / or             |          |
| 35 |                      | institution(s), if any, in developing the protocol            |          |
| 36 |                      |                                                               |          |
| 37 |                      |                                                               |          |
| 38 | <b>Introduction</b>  |                                                               |          |
| 39 |                      |                                                               |          |
| 40 |                      |                                                               |          |
| 41 |                      |                                                               |          |
| 42 |                      |                                                               |          |
| 43 | Rationale            | <a href="#">#6</a>                                            | 4-8      |
| 44 |                      | Describe the rationale for the review in the context of what  |          |
| 45 |                      | is already known                                              |          |
| 46 |                      |                                                               |          |
| 47 |                      |                                                               |          |
| 48 | Objectives           | <a href="#">#7</a>                                            | 8        |
| 49 |                      | Provide an explicit statement of the question(s) the review   |          |
| 50 |                      | will address with reference to participants, interventions,   |          |
| 51 |                      | comparators, and outcomes (PICO)                              |          |
| 52 |                      |                                                               |          |
| 53 |                      |                                                               |          |
| 54 |                      |                                                               |          |
| 55 | <b>Methods</b>       |                                                               |          |
| 56 |                      |                                                               |          |
| 57 |                      |                                                               |          |
| 58 | Eligibility criteria | <a href="#">#8</a>                                            | 9-10     |
| 59 |                      | Specify the study characteristics (such as PICO, study        |          |
| 60 |                      | design, setting, time frame) and report characteristics       |          |
|    |                      | (such as years considered, language, publication status)      |          |
|    |                      | to be used as criteria for eligibility for the review         |          |

|    |                   |                      |                                                                 |       |
|----|-------------------|----------------------|-----------------------------------------------------------------|-------|
| 1  | Information       | <a href="#">#9</a>   | Describe all intended information sources (such as              | 11    |
| 2  |                   |                      |                                                                 |       |
| 3  | sources           |                      | electronic databases, contact with study authors, trial         |       |
| 4  |                   |                      | registers or other grey literature sources) with planned        |       |
| 5  |                   |                      | dates of coverage                                               |       |
| 6  |                   |                      |                                                                 |       |
| 7  |                   |                      |                                                                 |       |
| 8  |                   |                      |                                                                 |       |
| 9  |                   |                      |                                                                 |       |
| 10 |                   |                      |                                                                 |       |
| 11 | Search strategy   | <a href="#">#10</a>  | Present draft of search strategy to be used for at least one    | 11    |
| 12 |                   |                      |                                                                 |       |
| 13 |                   |                      | electronic database, including planned limits, such that it     |       |
| 14 |                   |                      | could be repeated                                               |       |
| 15 |                   |                      |                                                                 |       |
| 16 |                   |                      |                                                                 |       |
| 17 |                   |                      |                                                                 |       |
| 18 | Study records -   | <a href="#">#11a</a> | Describe the mechanism(s) that will be used to manage           | 11    |
| 19 |                   |                      |                                                                 |       |
| 20 | data management   |                      | records and data throughout the review                          |       |
| 21 |                   |                      |                                                                 |       |
| 22 |                   |                      |                                                                 |       |
| 23 |                   |                      |                                                                 |       |
| 24 | Study records -   | <a href="#">#11b</a> | State the process that will be used for selecting studies       | 11-12 |
| 25 |                   |                      |                                                                 |       |
| 26 | selection process |                      | (such as two independent reviewers) through each phase          |       |
| 27 |                   |                      | of the review (that is, screening, eligibility and inclusion in |       |
| 28 |                   |                      | meta-analysis)                                                  |       |
| 29 |                   |                      |                                                                 |       |
| 30 |                   |                      |                                                                 |       |
| 31 |                   |                      |                                                                 |       |
| 32 |                   |                      |                                                                 |       |
| 33 |                   |                      |                                                                 |       |
| 34 | Study records -   | <a href="#">#11c</a> | Describe planned method of extracting data from reports         | 12-14 |
| 35 |                   |                      |                                                                 |       |
| 36 | data collection   |                      | (such as piloting forms, done independently, in duplicate),     |       |
| 37 |                   |                      |                                                                 |       |
| 38 | process           |                      | any processes for obtaining and confirming data from            |       |
| 39 |                   |                      | investigators                                                   |       |
| 40 |                   |                      |                                                                 |       |
| 41 |                   |                      |                                                                 |       |
| 42 |                   |                      |                                                                 |       |
| 43 |                   |                      |                                                                 |       |
| 44 | Data items        | <a href="#">#12</a>  | List and define all variables for which data will be sought     | 13-14 |
| 45 |                   |                      |                                                                 |       |
| 46 |                   |                      | (such as PICO items, funding sources), any pre-planned          |       |
| 47 |                   |                      | data assumptions and simplifications                            |       |
| 48 |                   |                      |                                                                 |       |
| 49 |                   |                      |                                                                 |       |
| 50 |                   |                      |                                                                 |       |
| 51 | Outcomes and      | <a href="#">#13</a>  | List and define all outcomes for which data will be sought,     | 13-14 |
| 52 |                   |                      |                                                                 |       |
| 53 | prioritization    |                      | including prioritization of main and additional outcomes,       |       |
| 54 |                   |                      | with rationale                                                  |       |
| 55 |                   |                      |                                                                 |       |
| 56 |                   |                      |                                                                 |       |
| 57 |                   |                      |                                                                 |       |
| 58 |                   |                      |                                                                 |       |
| 59 |                   |                      |                                                                 |       |
| 60 |                   |                      |                                                                 |       |

|    |                    |                      |                                                                  |           |
|----|--------------------|----------------------|------------------------------------------------------------------|-----------|
| 1  | Risk of bias in    | <a href="#">#14</a>  | Describe anticipated methods for assessing risk of bias of       | 12        |
| 2  |                    |                      |                                                                  |           |
| 3  | individual studies |                      | individual studies, including whether this will be done at       |           |
| 4  |                    |                      |                                                                  |           |
| 5  |                    |                      | the outcome or study level, or both; state how this              |           |
| 6  |                    |                      |                                                                  |           |
| 7  |                    |                      | information will be used in data synthesis                       |           |
| 8  |                    |                      |                                                                  |           |
| 9  |                    |                      |                                                                  |           |
| 10 |                    |                      |                                                                  |           |
| 11 | Data synthesis     | <a href="#">#15a</a> | Describe criteria under which study data will be                 | 14        |
| 12 |                    |                      |                                                                  |           |
| 13 |                    |                      | quantitatively synthesised                                       |           |
| 14 |                    |                      |                                                                  |           |
| 15 |                    |                      |                                                                  |           |
| 16 | Data synthesis     | <a href="#">#15b</a> | If data are appropriate for quantitative synthesis, describe     | 14-15     |
| 17 |                    |                      |                                                                  |           |
| 18 |                    |                      | planned summary measures, methods of handling data               |           |
| 19 |                    |                      |                                                                  |           |
| 20 |                    |                      | and methods of combining data from studies, including            |           |
| 21 |                    |                      |                                                                  |           |
| 22 |                    |                      | any planned exploration of consistency (such as I <sup>2</sup> , |           |
| 23 |                    |                      |                                                                  |           |
| 24 |                    |                      | Kendall's $\tau$ )                                               |           |
| 25 |                    |                      |                                                                  |           |
| 26 |                    |                      |                                                                  |           |
| 27 |                    |                      |                                                                  |           |
| 28 | Data synthesis     | <a href="#">#15c</a> | Describe any proposed additional analyses (such as               | 14-15     |
| 29 |                    |                      |                                                                  |           |
| 30 |                    |                      | sensitivity or subgroup analyses, meta-regression)               |           |
| 31 |                    |                      |                                                                  |           |
| 32 |                    |                      |                                                                  |           |
| 33 |                    |                      |                                                                  |           |
| 34 | Data synthesis     | <a href="#">#15d</a> | If quantitative synthesis is not appropriate, describe the       | 14        |
| 35 |                    |                      |                                                                  |           |
| 36 |                    |                      | type of summary planned                                          |           |
| 37 |                    |                      |                                                                  |           |
| 38 |                    |                      |                                                                  |           |
| 39 | Meta-bias(es)      | <a href="#">#16</a>  | Specify any planned assessment of meta-bias(es) (such            | n/a - not |
| 40 |                    |                      |                                                                  | planned   |
| 41 |                    |                      | as publication bias across studies, selective reporting          |           |
| 42 |                    |                      |                                                                  |           |
| 43 |                    |                      | within studies)                                                  |           |
| 44 |                    |                      |                                                                  |           |
| 45 |                    |                      |                                                                  |           |
| 46 |                    |                      |                                                                  |           |
| 47 | Confidence in      | <a href="#">#17</a>  | Describe how the strength of the body of evidence will be        | 12        |
| 48 |                    |                      |                                                                  |           |
| 49 | cumulative         |                      | assessed (such as GRADE)                                         |           |
| 50 |                    |                      |                                                                  |           |
| 51 | evidence           |                      |                                                                  |           |
| 52 |                    |                      |                                                                  |           |
| 53 |                    |                      |                                                                  |           |
| 54 |                    |                      |                                                                  |           |

## Notes:

- 1b: n/a - not an update

- 1 • 5b: n/a - no specific funding
- 2
- 3
- 4 • 16: n/a - not planned The PRISMA-P elaboration and explanation paper is distributed under the
- 5 terms of the Creative Commons Attribution License CC-BY. This checklist was completed on 07.
- 6 July 2021 using <https://www.goodreports.org/>, a tool made by the [EQUATOR Network](#) in
- 7 collaboration with [Penelope.ai](#)
- 8
- 9
- 10
- 11
- 12
- 13
- 14
- 15
- 16
- 17
- 18
- 19
- 20
- 21
- 22
- 23
- 24
- 25
- 26
- 27
- 28
- 29
- 30
- 31
- 32
- 33
- 34
- 35
- 36
- 37
- 38
- 39
- 40
- 41
- 42
- 43
- 44
- 45
- 46
- 47
- 48
- 49
- 50
- 51
- 52
- 53
- 54
- 55
- 56
- 57
- 58
- 59
- 60

# BMJ Open

## Lactogenic hormones in relation to maternal metabolic health in pregnancy and postpartum: protocol for a systematic review

|                                 |                                                                                                                                                                                                                                                                                                                                                                                                                                                              |
|---------------------------------|--------------------------------------------------------------------------------------------------------------------------------------------------------------------------------------------------------------------------------------------------------------------------------------------------------------------------------------------------------------------------------------------------------------------------------------------------------------|
| Journal:                        | <i>BMJ Open</i>                                                                                                                                                                                                                                                                                                                                                                                                                                              |
| Manuscript ID                   | bmjopen-2021-055257.R1                                                                                                                                                                                                                                                                                                                                                                                                                                       |
| Article Type:                   | Protocol                                                                                                                                                                                                                                                                                                                                                                                                                                                     |
| Date Submitted by the Author:   | 21-Dec-2021                                                                                                                                                                                                                                                                                                                                                                                                                                                  |
| Complete List of Authors:       | Rassie, Kate; Monash Centre for Health Research and Implementation, ; Monash Health, Department of Diabetes<br>Giri, Rinky; Monash Health, Department of Diabetes<br>Melder, Angela; Monash Univeristy, Monash Centre for Health Research and Implementation,<br>Joham, Anju; Monash University<br>Mousa, Aya; Monash University, School of Public Health and Preventive Medicine<br>Teede, Helena; Monash University; Monash Health, Department of Diabetes |
| <b>Primary Subject Heading</b>: | Diabetes and endocrinology                                                                                                                                                                                                                                                                                                                                                                                                                                   |
| Secondary Subject Heading:      | Reproductive medicine, Obstetrics and gynaecology                                                                                                                                                                                                                                                                                                                                                                                                            |
| Keywords:                       | Diabetes & endocrinology < INTERNAL MEDICINE, Diabetes in pregnancy < DIABETES & ENDOCRINOLOGY, Maternal medicine < OBSTETRICS                                                                                                                                                                                                                                                                                                                               |
|                                 |                                                                                                                                                                                                                                                                                                                                                                                                                                                              |

SCHOLARONE™  
Manuscripts

1  
2  
3  
4  
5  
6  
7  
8  
9  
10  
11  
12  
13  
14  
15  
16  
17  
18  
19  
20  
21  
22  
23  
24  
25  
26  
27  
28  
29  
30  
31  
32  
33  
34  
35  
36  
37  
38  
39  
40  
41  
42  
43  
44  
45  
46  
47  
48  
49  
50  
51  
52  
53  
54  
55  
56  
57  
58  
59  
60

## Lactogenic hormones in relation to maternal metabolic health in pregnancy and postpartum: protocol for a systematic review

Kate Rassie<sup>1,2</sup>, Rinky Giri<sup>2</sup>, Angela M Melder<sup>1</sup>, Anju Joham<sup>1,2</sup>, Aya Mousa<sup>1</sup>, Helena Teede<sup>1,2</sup>

<sup>1</sup> Monash Centre for Health Research and Implementation (MCHRI), School of Public Health and Preventive Medicine, Monash University

<sup>2</sup> Department of Diabetes, Monash Health, Melbourne, Australia

### \*Corresponding author:

Prof. Helena J Teede, MBBS PhD FRACP

Monash Centre for Health Research and Implementation (MCHRI)

School of Public Health and Preventive Medicine, Monash University

Level 1, 43-51 Kanooka Grove, Clayton

Melbourne, VIC 3168, Australia

Telephone: +61 3 8572 2643; Fax: +61 3 9594 7554

Email: [helena.teede@monash.edu](mailto:helena.teede@monash.edu)

**Word count: 4154** (excluding abstract, figures, tables, acknowledgements, and references)

**Tables: 2**

**Figures: 0**

**Supplementary materials:**

Supplementary materials 1 – search strategy

Supplementary materials 2 – critical appraisal template

**Keywords:** diabetes, gestational; diabetes mellitus; obesity, maternal; prolactin; placental lactogen



## ABSTRACT

**Introduction:** Maternal metabolic disease states (such as gestational and pre-gestational diabetes, and maternal obesity) are reaching epidemic proportions worldwide and are associated with adverse maternal and fetal outcomes. Despite this, their aetiology remains incompletely understood. Lactogenic hormones, namely human placental lactogen and prolactin, play often overlooked roles in maternal metabolism and glucose homeostasis during pregnancy and (in the case of prolactin) postpartum, and have clinical potential from a diagnostic and therapeutic perspective. This manuscript presents a protocol for a systematic review which will synthesise the available scientific evidence linking these two hormones to maternal and fetal metabolic conditions/ outcomes.

**Methods and analysis:** Medline (via OVID), CINAHL and EMBASE will be systematically searched for all original observational and interventional research articles, published prior to 8 July 2021, linking human placental lactogen and/ or prolactin levels (in pregnancy and/ or up to 12 months postpartum) to key maternal metabolic conditions/ outcomes (including pre-existing and gestational diabetes, markers of glucose/ insulin metabolism, postpartum glucose status, weight change, obesity and polycystic ovary syndrome). Relevant fetal outcomes (birthweight and placental mass, macrosomia and growth restriction) will also be included. Two reviewers will assess articles for eligibility according to pre-specified selection criteria, followed by full text review, quality appraisal and data extraction. Where possible, meta-analysis will be performed, otherwise a narrative synthesis of findings will be presented.

**Ethics and dissemination:** Formal ethical approval is not required as no primary data will be collected. The results will be published in a peer-reviewed journal and presented at conference meetings, and will be used to inform future research directions.

**PROSPERO registration details** CRD42021262771.

**ARTICLE SUMMARY****STRENGTHS AND LIMITATIONS OF THIS STUDY**

- Novel and relevant research area linking lactation hormones to maternal metabolic health, with particular relevance to pregnancies affected by obesity and/ or diabetes
- Protocol is for the first systematic review in this area
- Employs rigorous, standardised methodology; and will involve an exhaustive literature search and quality appraisal
- Limitations include the anticipated heterogeneity in study designs, most of which will likely be observational in nature and hence unable to establish causality.

For peer review only

## INTRODUCTION

Pregnancy entails profound maternal physiological and metabolic adaptations to accommodate the needs of the growing fetus, and to prepare for lactation. An increase in insulin resistance of 50-60% between pre-pregnancy and the late third trimester is a physiologic change in every pregnancy (regardless of glucose tolerance), and is essential to prioritise the delivery of glucose across the placenta for fetal development [1]. This is paralleled - in a normal pregnancy - by adaptive changes in the islets of the maternal endocrine pancreas to allow increasing insulin synthesis and secretion, including an increased beta-cell mass. Overall, this results in maintenance of maternal glucose homeostasis [1].

Gestational diabetes mellitus (GDM) may develop when there is failure to balance insulin secretion with the composite of pre-pregnancy and pregnancy-induced insulin resistance, and is an increasingly prevalent condition (affecting between 2 and 38% of pregnant women worldwide) [2]. GDM is associated with multiple adverse maternal and fetal outcomes, including macrosomia, pre-eclampsia and gestational hypertension, polyhydramnios, stillbirth, and neonatal hypoglycaemia; as well as an increased lifetime risk of obesity and dysglycaemia in the offspring [3]. In women with pre-existing diabetes mellitus (type 1 or type 2), superimposed pregnancy-induced insulin resistance exacerbates established pre-gestational insulin resistance and/ or deficiency, with similar potential complications.

Lactogenic hormones, chiefly human placental lactogen (hPL) and prolactin (PRL), are well-recognised for their roles in the antenatal preparation of the breast for lactation, and – in the case of PRL – in establishing and maintaining lactation after delivery. However, these hormones also have central roles in maternal metabolism: during gestation, both contribute to insulin resistance but are also likely to act as stimuli for the adaptation of maternal pancreatic islet function. Postpartum, the hormonal control of lactation (primarily mediated by PRL) may

1  
2  
3 fundamentally alter carbohydrate and lipid metabolism and adipocyte biology, guarding  
4 lactating postpartum women against progression to type 2 diabetes [4].  
5  
6  
7

8 **Human placental lactogen** is a peptide hormone produced by the placenta. It is detectable as  
9 early as 6 weeks' gestation and increases across gestation, peaking at around 30 weeks. The  
10 secretion rate of hPL near term is about 1g/ day (a rate considerably greater than that of any  
11 other protein hormone) [5] and the peak concentration of hPL is at least 25-fold that of PRL  
12 [4]. hPL binds with high affinity to the PRL receptor, and is increasingly recognised as playing  
13 a major role in the modulation of maternal metabolism to meet the energy requirements of the  
14 growing fetus [6]. It is also involved in lactogenesis I (secretory initiation), supporting alveolar  
15 and ductal growth in the breast in preparation for milk production [5].  
16  
17  
18  
19  
20  
21  
22  
23  
24  
25

26  
27 As one of the major 'diabetogenic' hormones of pregnancy (alongside placental growth  
28 hormone, progesterone, cortisol, and PRL), hPL increases maternal insulin resistance and  
29 reduces maternal glucose utilisation, elevating maternal blood glucose levels (supporting  
30 transplacental glucose transfer and adequate fetal nutrition) [4]. However, this appears to be  
31 matched by parallel upregulation of insulin secretory capacity. In rodent models, placental  
32 lactogens significantly increase glucose-induced insulin secretion, beta-cell proliferation and  
33 survival in isolated pancreatic islets [7-9]. In humans, in vitro evidence using human islet cell  
34 tissue suggests that hPL also acts (likely via the PRL receptor) on the endocrine pancreas to  
35 promote maternal beta-cell function, enhancing insulin synthesis and glucose-stimulated  
36 insulin secretion [9]. The net effect of this is – in a healthy pregnancy – maintenance of  
37 maternal normoglycaemia.  
38  
39  
40  
41  
42  
43  
44  
45  
46  
47  
48  
49  
50  
51

52  
53 Human placental lactogen also increases lipolysis and release of free fatty acids (FFAs). With  
54 maternal fasting, hPL release increases the availability of FFAs to the mother for use as fuel;  
55 sparing glucose and amino acids for placental transport and fetal nutrition [10]. hPL is also  
56 likely to play a role in inducing and maintaining the state of physiological hyperleptinaemia  
57  
58  
59  
60

1  
2  
3 but relative leptin-resistance seen in pregnancy, which provides maternal appetite stimulus  
4 even with increasing adipose deposition [4]. Human placental lactogen (and PRL) also seem to  
5  
6 increase appetite and food intake via other mechanisms, with widespread distribution of PRL  
7  
8 receptors in the hypothalamus and induction of hyperphagia after intracerebroventricular  
9  
10 administration suggesting a central mode of action [11].  
11  
12  
13

14  
15 Being placentally-derived, hPL is also positively correlated with birthweight and placental  
16  
17 mass; with potential clinical application in the antenatal prediction of macrosomia and/ or fetal  
18  
19 growth restriction in both metabolically-normal and abnormal pregnancies [12].  
20  
21  
22

23 **Prolactin** is a peptide hormone produced by lactotrophs in the anterior pituitary gland, and has  
24  
25 close structural homology to hPL. Basal serum PRL increases progressively during normal  
26  
27 pregnancy, with peak values in late gestation approximately 10-fold higher than pre-conception  
28  
29 [4]. Whilst best known for its lactogenic effect on the female mammary gland, PRL also alters  
30  
31 insulin sensitivity and lipid metabolism. PRL may induce insulin resistance outside of  
32  
33 pregnancy (as demonstrated in non-pregnant prolactinoma patients with pathological PRL  
34  
35 elevation) [13]; and, like hPL, is likely to contribute to the insulin resistant state of pregnancy,  
36  
37 ensuring the availability of glucose for the fetal-placental compartment. However, the  
38  
39 physiological contribution of PRL to glucose tolerance in pregnancy and postpartum is thought  
40  
41 to differ from other states of relative or absolute hyperprolactinaemia [4]. In vitro evidence  
42  
43 suggests that PRL (like hPL) can directly enhance insulin secretion from human islets, although  
44  
45 the latter hormone may have the dominant effect during human pregnancy due to its higher  
46  
47 concentrations [9]. It is worth noting that rodent evidence for the effect of PRL on maternal  
48  
49 beta-cell function during pregnancy is striking: knockout mice specifically lacking PRL  
50  
51 receptors on pancreatic beta-cells have normal glucose tolerance outside of pregnancy, but  
52  
53 become progressively glucose intolerant with gestation due to corresponding failure of beta-  
54  
55 cell proliferation – essentially, developing GDM [14, 15].  
56  
57  
58  
59  
60

1  
2  
3 Postpartum, physiological hyperprolactinaemia is the key endocrine change responsible for the  
4 initiation and maintenance of lactation. Prolactin concentrations during lactation are  
5 intermediate between those in the non-pregnant state and those in late pregnancy, and the  
6 pulsatile nature of secretion (lost during pregnancy) is restored. PRL surges occur following  
7 nursing, and peaks are higher in women who exclusively breastfeed their infants than in those  
8 who supplement with formula or only feed formula. In women who do not breastfeed, PRL  
9 falls to non-pregnant concentrations within 3 weeks postpartum [4].  
10  
11  
12  
13  
14  
15  
16  
17  
18  
19

20 Lactation – under the chief control of PRL – is a unique metabolic state associated with an  
21 elevation of plasma FFAs, and with the mobilisation of lipids from diet and adipose stores to  
22 the breast for milk production. Observational evidence suggests that lactation is associated with  
23 maternal metabolic benefits, with consistent findings of lower rates of persistent postpartum  
24 dysglycaemia and progression to type 2 diabetes in women who breastfeed compared with  
25 those who do not (both in the general population [16] and following GDM pregnancy [17]). As  
26 such, PRL may link effective and sustained lactogenesis to improved maternal metabolic status  
27 postpartum. Whether this is primarily mediated by improved insulin secretory capacity or  
28 reduced insulin resistance remains unclear, as there are putative biological mechanisms for  
29 both in the postpartum context [4, 18, 19]. Regardless, lactation may present a particular  
30 window of opportunity for women with postpartum insulin resistance (relevant to many women  
31 following a GDM pregnancy) to significantly improve long-term health outcomes by  
32 improving insulin secretion and/or sensitivity. Indeed, some authors have argued that lactation  
33 (quite apart from its other benefits to mother and offspring) may be seen as a therapeutic  
34 intervention in this patient cohort, analogous to the prescription of an insulin-sensitising  
35 medication [4].  
36  
37  
38  
39  
40  
41  
42  
43  
44  
45  
46  
47  
48  
49  
50  
51  
52  
53  
54  
55  
56

57 It is also increasingly apparent that the relationship between impaired glucose/ insulin  
58 metabolism and poor lactation outcomes may be bidirectional. Whilst lactation outcomes are  
59 not the focus of this review, women with obesity and/ or diabetes are at increased risk of  
60

1  
2  
3 lactogenesis delay and persistent poor milk supply [20, 21], reasons for which may include a  
4 suboptimal PRL response to infant suckling [22] and impaired insulin-receptor dynamics at the  
5 level of the lactocyte [23]. Authors linking PRL to glucose dynamics during lactation have  
6 suggested that “good beta-cell plasticity” in metabolically-healthy women may exert a  
7 permissive effect on lactation, allowing PRL to play its primary evolutionary role [18]. As  
8 such, the women who stand to benefit most from the metabolic benefits of sustained lactation  
9 may face the most barriers to achieving it. A more complete understanding of lactogenic  
10 hormone action, and how it is altered in metabolically-abnormal pregnancies, is essential to  
11 promote and support lactation in this population.  
12  
13  
14  
15  
16  
17  
18  
19  
20  
21  
22

23  
24 Narrative reviews (which constitute the majority of the existing work in this area, and have  
25 produced many of the current mechanistic hypotheses) are often incomplete or reach subjective  
26 conclusions. Systematic reviews focused on key physiological questions are under-utilised in  
27 contemporary endocrine literature, and provide an opportunity to move toward extensive  
28 synthesis with objective, evidence-based conclusions. This review aims to systematically  
29 examine the relationship between hPL and PRL and maternal metabolism in pregnancy and  
30 postpartum, particularly in relation to common gestational metabolic conditions; as well as the  
31 association between hPL and PRL and key fetal outcomes. It also aims to provide mechanistic  
32 insights and to examine the clinical implications of these findings, from both a diagnostic and  
33 therapeutic perspective.  
34  
35  
36  
37  
38  
39  
40  
41  
42  
43  
44  
45  
46  
47

#### 48 **SYSTEMATIC REVIEW QUESTION**

49  
50  
51 In pregnant women (participants) what is the relationship between hPL/ PRL levels  
52 (exposures) and

- 53  
54  
55  
56 (a) maternal gestational metabolic status/ outcomes?
- 57  
58 (b) relevant fetal outcomes?
- 59  
60 (c) maternal metabolic outcomes up to 12 months postpartum?

## METHODS/ DESIGN

Rigorous international gold-standard methodology will be adopted in this review, which will conform to the Preferred Reporting Items for Systematic Reviews and Meta-Analysis (PRISMA) guidelines [24]. This review has been registered with the international prospective register of systematic reviews (PROSPERO), registration number CRD42021262771. We used the PRISMA-P checklist when writing this protocol paper [25]. Any future amendments to this protocol will be reported on PROSPERO and published with the results of the review.

## ELIGIBILITY CRITERIA

Selection criteria using a modified version of the Participant, Exposure, Comparison, Outcome and Study Type (PECOT) framework [26] (table 1), established a priori, will be used to determine the eligibility of articles to include in this review. All articles published prior to 8 July 2021 will be eligible, but only articles with full text available in English will be included.

It should be noted that the review aims to elucidate the *relationship* between maternal serum hPL/PRL levels and metabolic/ fetal conditions/ outcomes, without assuming causality or directionality. The designation of hPL and PRL levels as ‘exposure’ and the listed outcomes as ‘outcomes’ is somewhat arbitrary and may not apply to all studies: some may work in the opposite direction. For example, studies that enrol women with pre-existing diabetes or GDM (relevant metabolic exposure) and look at PRL and hPL levels across gestation (outcome) would warrant inclusion. It is acknowledged by the reviewers that the relationship between lactogenic hormones and maternal metabolism is likely bidirectional; and the inclusion criteria will reflect this.



**Table 1:** Modified PECOT framework for study inclusion/ exclusion

|                           | <b>Participants (P)</b>                                                                                                                                                                                                               | <b>Exposure (E)</b>                                                                                                                                                                                                                                                                                                                                                                                                                                                                                    | <b>Comparison (C)</b>                                                                  | <b>Outcomes (O)</b>                                                                                                                                                                                                                                                                                                                                                                                                                                                                                                                                                                                                                                                                                                   | <b>Study types (T)</b>                                                                                                                                                                                                                                                                                                                 |
|---------------------------|---------------------------------------------------------------------------------------------------------------------------------------------------------------------------------------------------------------------------------------|--------------------------------------------------------------------------------------------------------------------------------------------------------------------------------------------------------------------------------------------------------------------------------------------------------------------------------------------------------------------------------------------------------------------------------------------------------------------------------------------------------|----------------------------------------------------------------------------------------|-----------------------------------------------------------------------------------------------------------------------------------------------------------------------------------------------------------------------------------------------------------------------------------------------------------------------------------------------------------------------------------------------------------------------------------------------------------------------------------------------------------------------------------------------------------------------------------------------------------------------------------------------------------------------------------------------------------------------|----------------------------------------------------------------------------------------------------------------------------------------------------------------------------------------------------------------------------------------------------------------------------------------------------------------------------------------|
| <b>Inclusion criteria</b> | <p>Pregnant women</p> <p>Women up to 12 months postpartum (regardless of lactation status)</p>                                                                                                                                        | <p>Endogenous maternal serum hPL* (recorded at least once during pregnancy)</p> <p><b>OR</b></p> <p>Endogenous maternal serum PRL (recorded at least once during pregnancy and/ or up to 12 months postpartum)</p>                                                                                                                                                                                                                                                                                     | <p>Studies with any /multiple control group/s or no control group will be included</p> | <p><b>Maternal:</b></p> <p>Diabetes status during pregnancy and up to 12 months postpartum (pre-existing diabetes [Type 1 or Type 2], IGT or GDM; adequately defined)**</p> <p>Metabolic indices (continuous measurements) related to maternal glucose/ lipid metabolism (e.g. glucose measurements on OGTT; insulin secretion, sensitivity/ resistance indices; beta-cell function) during pregnancy or postpartum</p> <p>Obesity, gestational weight gainPostpartum weight change</p> <p>Polycystic ovary syndrome</p> <p>Lipid profile</p> <p><b>Infant:</b></p> <p>Birthweight (absolute / centiles, macrosomia), growth restriction or placental mass in pregnancies affected by GDM or pre-gestational DM**</p> | <p>Longitudinal cohort</p> <p>Case control</p> <p>Cross-sectional studies</p> <p>Randomised controlled trials</p> <p>Clinical observational human trials (eg. infusion/ clamp studies) if methods were used to determine a maternal metabolic outcome of interest</p> <p>Systematic reviews (to be examined for eligible articles)</p> |
| <b>Exclusion criteria</b> | <p>Non-pregnant populations</p> <p>Males</p> <p>Pathological / iatrogenic elevation of PRL (e.g. prolactinoma, medication-induced hyperprolactinaemia) or hPL (e.g. molar pregnancy)</p> <p>Studies focused on multiple pregnancy</p> | <p>hPL/PRL levels in other fluids (e.g. amniotic fluid, breastmilk), in fetus or infant, or in cord blood</p> <p>hPL/PRL administered exogenously</p> <p>Trials examining an intervention/ procedure (e.g. amniocentesis, induction of labour, drug treatment, IV glucose or insulin infusion, prolonged fasting) with hPL/PRL levels as outcome</p> <p>Trials focused on ART and ART outcomes</p> <p>Trials examining 'lactation' as exposure without PRL measured, OR where PRL measured but not</p> | <p>None</p>                                                                            | <p>Diabetes status during pregnancy and up to 12 months postpartum inadequately defined**</p> <p>Birthweight, placental weight or growth restriction in pregnancies <b>not</b> affected by GDM or pre-gestational DM</p> <p>Outcomes unrelated to named key maternal metabolic or infant outcomes, e.g.</p> <p>placental function / perfusion / blood flow without mention of weight or FGR [e.g. Doppler indices alone]</p> <p>pre-eclampsia</p> <p>miscarriage/ pregnancy loss</p> <p>fetal structural abnormalities/ congenital malformations</p>                                                                                                                                                                  | <p>Animal studies</p> <p>In vitro/ tissue culture studies</p> <p>Narrative reviews</p> <p>Commentaries/ letters</p> <p>Case reports, case series</p> <p>Conference abstracts</p> <p>Expert opinion</p> <p>Protocol papers</p>                                                                                                          |

|                                                                                                                                                                                                                                                                                                                                                                                                                                                                                                                                                                                                                                                                                                                                                                                                                                                                                                                                                                                                                                                                                                                                                                             |  |                                                  |  |                                                                                                                                     |  |
|-----------------------------------------------------------------------------------------------------------------------------------------------------------------------------------------------------------------------------------------------------------------------------------------------------------------------------------------------------------------------------------------------------------------------------------------------------------------------------------------------------------------------------------------------------------------------------------------------------------------------------------------------------------------------------------------------------------------------------------------------------------------------------------------------------------------------------------------------------------------------------------------------------------------------------------------------------------------------------------------------------------------------------------------------------------------------------------------------------------------------------------------------------------------------------|--|--------------------------------------------------|--|-------------------------------------------------------------------------------------------------------------------------------------|--|
|                                                                                                                                                                                                                                                                                                                                                                                                                                                                                                                                                                                                                                                                                                                                                                                                                                                                                                                                                                                                                                                                                                                                                                             |  | directly analysed relative to metabolic outcomes |  | diabetic retinopathy<br>lactation outcomes / parameters (milk transfer, milk production, infant weight change during breastfeeding) |  |
| <p>NOTES:</p> <p>*alternative name, <i>human chorionic somatomammotropin</i>, also included in search (and studies eligible for inclusion)</p> <p>** regarding classification of diabetes type:</p> <p>INCLUDE studies referring clearly to Type 1 or Type 2 diabetes, or to gestational diabetes, or to impaired glucose tolerance</p> <p>INCLUDE studies which refer to 'insulin-dependent', 'juvenile-onset' or 'insulin-requiring' diabetes (inside or outside of pregnancy) ONLY IF the supporting data clearly suggests Type 1 diabetes</p> <p>EXCLUDE studies which refer to 'diabetic' pregnancies, 'diabetes', 'chemical diabetes', or 'diabetes mellitus' in pregnancy without further definition; or to 'pre-gestational' diabetes without further definition, or to 'insulin treated' diabetes without further clarification</p> <p>EXCLUDE studies which define diabetes <b>only</b> according to White's classification (A/B/C/D) for diabetes in pregnancy.</p> <p>If one group within a study is considered adequately-defined and another inadequately-defined; INCLUDE the study but only extract data for the groups meeting definition requirements</p> |  |                                                  |  |                                                                                                                                     |  |

Abbreviations: hPL, human placental lactogen; PRL, prolactin; ART, assisted reproductive technologies; GDM, gestational diabetes mellitus; FGR, fetal growth restriction; IGT, impaired glucose tolerance.

## SEARCH STRATEGY

A systematic search strategy using relevant search terms, in accordance with the selection criteria (Table 1) has been developed (see *supplementary material 1*), in consultation with expert subject librarians. A combination of keywords and database-specific subject headings will be used. The following electronic databases will be searched:

- MEDLINE via OVID
- MEDLINE ePub ahead of print, in-process, in-data review and other non-indexed citations via OVID
- CINAHL plus
- EMBASE

Bibliographies of relevant studies identified by the search strategy, and relevant reviews/ meta-analyses, will also be manually searched for identification of additional eligible studies.

Given that we intend to conduct an in-depth synthesis of a large body of research spanning several decades, only peer-reviewed published data with all results available will be considered

1  
2  
3 eligible for inclusion (conference abstracts will be excluded, and grey literature will not be  
4  
5 searched).  
6  
7

## 8 INCLUSION OF STUDIES 9

10  
11 References will be screened and managed using EndNote x9 and Covidence software. Two  
12  
13 reviewers will scan the titles, abstracts and keywords of every record retrieved by the search  
14  
15 strategy, assessing eligibility according to the inclusion and exclusion criteria in Table 1 (and  
16  
17 in consultation with a third reviewer where required). A pilot test of the selection criteria will  
18  
19 be conducted on 20-30 article titles and abstracts in order to refine and clarify the criteria prior  
20  
21 to the formal commencement of screening.  
22  
23  
24

25  
26 If initial information suggests that an article meets the selection criteria for eligibility, the full  
27  
28 text will be retrieved for further assessment by two reviewers. Disagreement between reviewers  
29  
30 as to whether a study meets inclusion criteria will be resolved by discussion, with referral to a  
31  
32 third reviewer if consensus cannot be reached. Studies excluded based on full text review will  
33  
34 be tabulated along with reasons for their exclusion. Following PRISMA guidelines [24], a flow  
35  
36 diagram will be created to illustrate the selection process.  
37  
38  
39

## 40 QUALITY APPRAISAL OF THE EVIDENCE 41

42  
43 Methodological quality of the included studies will be assessed by two independent reviewers  
44  
45 using criteria established *a priori*, outlined in the Monash Centre for Health Research and  
46  
47 Implementation (MCHRI) Evidence Synthesis Program critical appraisal template [27], see  
48  
49 *supplementary material 2*. Individual quality items will be investigated using a descriptive  
50  
51 component approach. Assessment will be based on criteria relating to external validity  
52  
53 (population, setting, clarity of study objectives, inclusion and exclusion criteria,  
54  
55 appropriateness of study design, and follow-up) and internal validity (selection, performance  
56  
57 and detection bias, attrition, exposure and outcome measurement, reporting bias and potential  
58  
59 confounders). Other domains for assessment will include potential conflicts of interest, study  
60

power, and appropriateness/ quality of statistical methodology. Any disagreement or uncertainty will be resolved by discussion among review authors. Using this approach, each study will be allocated a risk of bias rating.

## DATA EXTRACTION

Data will be extracted from all included studies by two independent reviewers, using a specifically-developed data extraction form. Pilot testing of the form will be conducted using 3-5 studies of different formats to ensure all required data are captured, particularly given the anticipated heterogeneity in study design. Key anticipated domains for extraction are shown in Table 2. Relevant data which are not reported in published studies will be requested from corresponding authors.

**Table 2.** Key domains for data extraction

|                                                       |                                                                                                                                                                                                                                                                                                                                                                                                                                                                                                                                                                                                                                                                                                                                                                                                                                                           |
|-------------------------------------------------------|-----------------------------------------------------------------------------------------------------------------------------------------------------------------------------------------------------------------------------------------------------------------------------------------------------------------------------------------------------------------------------------------------------------------------------------------------------------------------------------------------------------------------------------------------------------------------------------------------------------------------------------------------------------------------------------------------------------------------------------------------------------------------------------------------------------------------------------------------------------|
| <b>Study</b>                                          | <ul style="list-style-type: none"> <li>First author</li> <li>Journal</li> <li>Country and year of publication</li> <li>Study design</li> <li>Follow-up duration</li> </ul>                                                                                                                                                                                                                                                                                                                                                                                                                                                                                                                                                                                                                                                                                |
| <b>Participants</b>                                   | <ul style="list-style-type: none"> <li>Number of participants</li> <li>Participant characteristics (at baseline)               <ul style="list-style-type: none"> <li>- Baseline (pre-pregnancy) metabolic conditions, if present</li> <li>- Mean age</li> <li>- Parity</li> <li>- Ethnicity</li> <li>- Singleton/ multiple pregnancy</li> <li>- Gestation at enrolment/ recruitment</li> <li>- Mean BMI</li> <li>- Delivery mode</li> <li>- Breastfeeding status</li> </ul> </li> <li>If control group present, control characteristics (at baseline)               <ul style="list-style-type: none"> <li>- Mean age</li> <li>- Parity</li> <li>- Ethnicity</li> <li>- Singleton/ multiple pregnancy</li> <li>- Gestation at enrolment/ recruitment</li> <li>- Mean BMI</li> <li>- Delivery mode</li> <li>- Breastfeeding status</li> </ul> </li> </ul> |
| <b>Exposure* (lactogenic hormone)</b>                 | <ul style="list-style-type: none"> <li>Hormone measured (hPL/ PRL/both)</li> <li>Number of timepoints</li> <li>Time points (pregnancy), with concentration and units of hormone at each time point</li> <li>Time points (postpartum), with concentration and units of hormone at each time point</li> <li>Assay methodology used</li> </ul>                                                                                                                                                                                                                                                                                                                                                                                                                                                                                                               |
| <b>Key maternal metabolic outcome(s)* of interest</b> | <ul style="list-style-type: none"> <li>Key maternal “outcomes” assessed (from list)*               <ul style="list-style-type: none"> <li>For diabetes in pregnancy                   <ul style="list-style-type: none"> <li>- Pre-existing (T1/T2DM) or gestational</li> </ul> </li> </ul> </li> </ul>                                                                                                                                                                                                                                                                                                                                                                                                                                                                                                                                                   |
|                                                       | <ul style="list-style-type: none"> <li><i>Glucose status in pregnancy (pre-existing diabetes mellitus of any type OR gestational diabetes)</i></li> </ul>                                                                                                                                                                                                                                                                                                                                                                                                                                                                                                                                                                                                                                                                                                 |

|                                                                                                                |                                                                                                                                                                                                                                                                 |
|----------------------------------------------------------------------------------------------------------------|-----------------------------------------------------------------------------------------------------------------------------------------------------------------------------------------------------------------------------------------------------------------|
| <i>Postpartum glucose status</i>                                                                               | <ul style="list-style-type: none"> <li>- Gestation at diagnosis</li> <li>- Method used for diagnosis (eg OGTT)</li> <li>- Diagnostic criteria if stated</li> <li>- Treatment (diet/ oral medications/ insulin); and treatment commencement timepoint</li> </ul> |
| <i>Continuous metabolic indices related to maternal glucose/ lipid metabolism e.g. measures of</i>             |                                                                                                                                                                                                                                                                 |
| <i>-fasting glucose</i>                                                                                        | For postpartum glucose status                                                                                                                                                                                                                                   |
| <i>-1h and 2h OGTT glucose</i>                                                                                 | <ul style="list-style-type: none"> <li>- Time point</li> <li>- Method used for diagnosis (eg OGTT)</li> <li>- Diagnostic criteria, if stated</li> <li>- Prevalence of persistent dysglycaemia postpartum</li> </ul>                                             |
| <i>-insulin secretion</i>                                                                                      |                                                                                                                                                                                                                                                                 |
| <i>-insulin sensitivity</i>                                                                                    |                                                                                                                                                                                                                                                                 |
| <i>-insulin resistance</i>                                                                                     |                                                                                                                                                                                                                                                                 |
| <i>-beta-cell function</i>                                                                                     |                                                                                                                                                                                                                                                                 |
| <i>(during pregnancy or postpartum)</i>                                                                        | Relationship of said outcome(s) to hPL/PRL levels (as t-test result, odds ratio, regression coefficient etc)                                                                                                                                                    |
| <i>Gestational weight gain</i>                                                                                 | <ul style="list-style-type: none"> <li>- Unadjusted</li> <li>- After adjustment (with list of covariates included in model/s)</li> </ul>                                                                                                                        |
| <i>Obesity</i>                                                                                                 |                                                                                                                                                                                                                                                                 |
| <i>Postpartum weight change</i>                                                                                | Conclusions regarding the above                                                                                                                                                                                                                                 |
| <i>Polycystic ovary syndrome</i>                                                                               |                                                                                                                                                                                                                                                                 |
| <i>Lipid profile (total cholesterol, HDL and LDL cholesterol, triglycerides)</i>                               |                                                                                                                                                                                                                                                                 |
| <b>Key infant metabolic outcome(s)* of interest (for pregnancies affected by GDM or pre-existing diabetes)</b> | Key infant outcomes assessed (from list)                                                                                                                                                                                                                        |
| <i>Birthweight (absolute/ centiles)</i>                                                                        | Relationship of said outcome to hPL/PRL levels (as t-test result, odds ratio, regression coefficient etc)                                                                                                                                                       |
| <i>Macrosomia</i>                                                                                              | <ul style="list-style-type: none"> <li>- Unadjusted</li> <li>- After adjustment (with list of covariates included in model/s)</li> </ul>                                                                                                                        |
| <i>Growth restriction</i>                                                                                      |                                                                                                                                                                                                                                                                 |
| <i>Placental mass</i>                                                                                          | Conclusions regarding the above                                                                                                                                                                                                                                 |

\*Due to the likely bidirectional nature of the lactogenic hormone/ maternal metabolism relationship, some studies will consider hPL/PRL as ‘exposure’ and a metabolic parameter (e.g. postpartum glucose tolerance) as ‘outcome’. Others may consider a metabolic parameter (e.g maternal pre-gestational diabetes) as ‘exposure’ with hPL/PRL levels during pregnancy, in comparison to healthy controls, as ‘outcome’. The extraction template will accommodate both.

Abbreviations: hPL, human placental lactogen; PRL, prolactin; BMI, body mass index; T1DM, type 1 diabetes mellitus; T2DM, type 2 diabetes mellitus; OGTT, oral glucose tolerance test; HDL, high density lipoprotein; LDL, low density lipoprotein; GDM, gestational diabetes mellitus

## STATISTICAL ANALYSIS

Analysis for the two lactogenic hormones of interest, hPL and PRL, will be undertaken separately. Key exposure / outcome associations for each hormone will be determined based on the number of studies available. It is anticipated that hPL will be analysed primarily in relation to maternal metabolic / glycaemic status during pregnancy, and to fetal outcomes (birthweight, macrosomia, growth restriction, placental mass) in pregnancies affected by diabetes. For PRL, it is anticipated that key outcomes will be maternal metabolic / glycaemic status and related maternal metabolic indices (measures of insulin secretion, sensitivity and

1  
2  
3 beta-cell function) both during pregnancy and postpartum. After data extraction, the reviewers  
4 will determine whether meta-analysis is appropriate (based on the number of studies for each  
5 hormone/outcome relationship and the heterogeneity of their designs and participant groups).  
6  
7 If meta-analysis is possible, Review Manager statistical software will be used for analysis with  
8 random effects models employed to generate weighted mean differences. Statistical  
9 heterogeneity will be assessed using the  $I^2$  test, with  $I^2$  values  $> 50\%$  indicating moderate to  
10 high heterogeneity. Sensitivity analyses will be performed where applicable to explore the  
11 effects of studies with high risk of bias on the overall results. Subgroup analyses will also be  
12 performed where possible (for example; by type of diabetes). Where meta-analysis is not  
13 possible, a narrative synthesis of results will be performed.  
14  
15  
16  
17  
18  
19  
20  
21  
22  
23  
24  
25  
26

27 Data will be presented in summary tables and in narrative format to describe the populations,  
28 exposures and key outcomes of the included studies. Forest plots and funnel plots will be used  
29 to present results from meta-analyses (where applicable) and publication bias assessments,  
30 respectively. Meta-analysis results will be reported according to PRISMA guidelines [24].  
31  
32  
33  
34  
35  
36

### 37 ETHICS AND DISSEMINATION

38  
39 This project will collate aggregate data from published studies (or aggregate data provided by  
40 study investigators upon request), and thus ethical approval will not be required.  
41  
42  
43  
44

45 Findings will be disseminated via publications in peer-reviewed journals and presentations at  
46 scientific meetings. If deemed appropriate, findings will also be communicated to relevant  
47 stakeholders to guide clinical practice and public health actions in this area.  
48  
49  
50  
51

### 52 DATA AVAILABILITY STATEMENT

53  
54  
55 No data have been generated or analysed in this manuscript.  
56  
57  
58  
59  
60

## PATIENT AND PUBLIC INVOLVEMENT STATEMENT

It was not feasible or appropriate to involve patients or members of the public in the design, planning or conduct of the planned research.

## DISCUSSION

The proposed review will be the first, to our knowledge, to systematically collate and synthesise the existing scientific literature linking two key lactogenic hormones, hPL and PRL, to maternal metabolic health in pregnancy and postpartum (and, by extension, to infant outcomes). Systematic reviews which evaluate biomarkers or aim to explore physiological questions are rare in the endocrine literature, and represent an under-utilised opportunity to move beyond subjective, narrative work towards inclusive, extensive reviews with the potential for objective and evidence-based conclusions.

Whilst these hormones have long been recognised for their roles in the antenatal preparation of the breast for lactation and (in the case of PRL) for the postnatal initiation and maintenance of lactation, their metabolic roles have been relatively under-appreciated. Both hormones contribute to the insulin resistance associated with the pregnant state, but also potentially have central roles in the adaptation of the maternal pancreas during gestation, stimulating beta-cell adaptation and increasing beta-cell mass and insulin secretion [1, 9]. During a normal pregnancy, this may allow compensation for pregnancy-induced insulin resistance, resulting in overall maintenance of euglycaemia.

Despite likely playing a key role in the regulation of glucose and insulin dynamics during pregnancy, the relationship between hPL levels and the pathophysiology of GDM remains unclear. Several studies have investigated possible links, with some reporting no association between maternal hPL levels and GDM status [28-31], and others reporting higher hPL in GDM subjects than controls [32, 33], particularly if insulin-treated [34]. For hPL levels during pregnancies affected by pre-existing diabetes (T1DM/ T2DM), the majority of authors report

1  
2  
3 serially-higher hPL throughout gestation in diabetic women compared with controls [29, 32,  
4 35-37], although other studies in T1DM have shown lower levels in the setting of poor control  
5 [38]. Furthermore, higher hPL levels are clearly related to increased placental weight and  
6  
7  
8  
9  
10  
11  
12  
13  
14  
15  
16  
17  
18  
19  
20  
21  
22  
23  
24  
25  
26  
27  
28  
29  
30  
31  
32  
33  
34  
35  
36  
37  
38  
39  
40  
41  
42  
43  
44  
45  
46  
47  
48  
49  
50  
51  
52  
53  
54  
55  
56  
57  
58  
59  
60

serially-higher hPL throughout gestation in diabetic women compared with controls [29, 32, 35-37], although other studies in T1DM have shown lower levels in the setting of poor control [38]. Furthermore, higher hPL levels are clearly related to increased placental weight and macrosomia, and several authors have suggested that increased levels of hPL in many diabetic pregnancies may simply reflect higher placental mass [4, 32, 35]. This does not suggest it is aetiologically unimportant, however – it is possible that the placentomegaly seen in maternal diabetes causes higher hPL levels, stimulating maternal and fetal beta-cell expansion and increasing fetal insulin production, thus promoting glycogenesis, fat deposition and further fetal growth [6].

Importantly however, this area of the literature is particularly dated, with many studies performed well prior to the 21<sup>st</sup> century and prior to contemporary diagnostic definitions of diabetes in pregnancy. As such, the exact type of maternal diabetes among study participants is often unclear (they are simply deemed to be ‘diabetic’, are defined according to the now-historical White’s Classification of diabetes in pregnancy [39], or are termed ‘insulin-dependent’) [30, 32, 35-38]. Such studies provided valuable basic insights into the pathophysiology of the lactogen/maternal metabolism relationship, but comparison to the available better-described contemporary cohorts [28] is not possible. In this systematic review, a sufficiently clear definition of diabetes type (or adequate detail for this to be confidently deduced) is thus mandated for inclusion, as we believe this is a minimum requirement if our review findings are to be applicable to modern obstetric populations.

Acknowledging these challenges, a better understanding of the role of hPL in metabolically-abnormal pregnancies has potential clinical application. For example, accurate antenatal prediction of fetal macrosomia remains challenging, and current macrosomia prediction strategies (including physical examination and ultrasound assessment) are both resource-intensive and imprecise. There is thus a clear requirement for maternal serum biomarkers in improving antenatal macrosomia prediction, particularly in women at high risk of the outcome



1  
2  
3 (such as those with pre-gestational diabetes or GDM). Whilst several candidate maternal  
4 biomarkers have been assessed for their association with birthweight or macrosomia (both in  
5 diabetic and non-diabetic pregnancies), evidence is mixed and uncertainties around clinical  
6 utility persist [40]. hPL (which was used clinically in some settings to assess the wellbeing of  
7 the fetoplacental unit in the 1970s and 1980s prior to the widespread availability of obstetric  
8 ultrasound)[41] has recently been largely overlooked as a candidate biomarker in this capacity,  
9 but previous work suggests it may have significant potential if revisited. For instance, one 1998  
10 study measured hPL at the time of GDM screening (n=257) and found that among the subset  
11 of women with a normal glucose challenge test but whose infants ultimately weighed >4000 g  
12 (n=11), mean hPL at the time of testing had in fact been similar to the mean hPL found in  
13 women with GDM [42]. This suggests that hPL may warrant evaluation as a biomarker for  
14 macrosomia prediction, both in women with diagnosed diabetes and those without. Such an  
15 application would require the marker to be validated in modern cohorts where the underlying  
16 aetiology of maternal diabetes was adequately understood and described.

17  
18 Unlike hPL (which, as a placentally-derived hormone, is washed from the circulation following  
19 delivery), PRL has probable influence in maternal metabolism both during pregnancy and  
20 postpartum, particularly if lactation ensues. The literature here is similarly conflicting. For  
21 example, maternal serum PRL levels during GDM pregnancy have been examined by several  
22 groups, with the majority reporting similar levels to normal pregnancies [28, 31, 43]. However,  
23 more recent studies have directly contradicted this. Two groups have shown that higher PRL  
24 levels in the first [44] and third [45] trimester of pregnancy were associated with reduced  
25 glucose tolerance on OGTT, with both groups suggesting that PRL may be independently  
26 involved in GDM pathogenesis. A third study has demonstrated an opposite result, showing an  
27 inverse association between third trimester PRL and GDM risk [46]. This lack of consensus  
28 highlights the need for effective evidence synthesis followed by further research.

1  
2  
3 Postpartum, lactation (under the chief control of PRL) appears to confer maternal metabolic  
4 benefits, but the mechanism by which this occurs is unclear. One group found that maternal  
5 serum PRL in late pregnancy was significantly higher in women who progressed to normal  
6 glucose tolerance postpartum than in those who progressed to postpartum prediabetes/ diabetes;  
7 and that higher antepartum PRL independently predicted improved postpartum insulin  
8 secretion capacity. That group suggested that these findings may reflect a postpartum extension  
9 of the beneficial effects of PRL on beta-cell mass and islet adaptation that are thought to occur  
10 during gestation. Another group, who measured PRL postpartum, presented different findings  
11 and discussion: women with higher circulating PRL in the context of lactation in their study  
12 had reduced beta-cell function and lower insulin secretion indices; but were less insulin  
13 resistant [18]. Authors have suggested that this improvement in insulin resistance may result  
14 from the mobilisation of muscle and liver lipids into breast milk under the control of PRL [4],  
15 an action that may be particularly beneficial in women who are insulin resistant at baseline  
16 (women with recent GDM are known to have increased intramyocellular lipid content, IMCL,  
17 at 4-6 months post-delivery compared with controls) [47].

18  
19  
20  
21  
22  
23  
24  
25  
26  
27  
28  
29  
30  
31  
32  
33  
34  
35  
36  
37  
38  
39  
40  
41  
42  
43  
44  
45  
46  
47  
48  
49  
50  
51  
52  
53  
54  
55  
56  
57  
58  
59  
60  
There is thus a clear need for a systematic review of the literature in this field – both lactogenic  
hormones clearly have central roles in the regulation of maternal metabolism (both during  
pregnancy and postpartum, and for women with normal and abnormal pregnancies). However,  
to date the evidence has not, to our knowledge, been effectively synthesised.

Some limitations of the review process should be noted. Firstly, owing to the intentionally-  
broad scope of the review, included studies will be heterogeneous in their design, methodology  
and research questions. In the analysis phase, hPL and PRL will thus be considered separately  
and studies will be grouped according to similar outcomes; but it is possible that marked  
heterogeneity will preclude meaningful conclusions and/ or statistical meta-analysis. Secondly,  
some of the basic clinical work on hPL and PRL levels in normal and diabetic pregnancies is  
now very dated, extending back to the 1970s and 1980s. Whilst robust and worthy of inclusion,

1  
2  
3 differences in experimental design and (in particular) the classification and treatment of  
4 maternal diabetes will present challenges when comparing such studies to modern cohorts. As  
5 such, clear requirements for the adequacy of maternal diabetes definitions have been stipulated  
6 in our inclusion and exclusion criteria. Where possible, we will endeavour to conduct a  
7 subgroup analysis by publication year range or otherwise perform a narrative comparison  
8 between older and newer studies. We will also extract and tabulate variables such as the exact  
9 GDM diagnostic criteria used, and the assay methodology employed in each case; as such  
10 details are likely to vary according to era of publication (in particular, many older studies  
11 involve the routine use of radioimmunoassay, now largely superseded by modern enzyme-  
12 linked immunoassay techniques). Finally, as previously described, the relationship between  
13 lactogenic hormones and maternal metabolism is almost certainly bidirectional, whereby some  
14 studies examine the effects of lactogenic hormones (exposure) on metabolic conditions  
15 (outcome), whilst in others, exposure and outcome are reversed. The review is designed to  
16 capture both, but – particularly in the postpartum context – the bidirectional nature of the  
17 relationship can bias observational studies. While this cannot be directly addressed in our  
18 review methodology, it will be acknowledged in the synthesis and interpretation of the findings.

## 43 CONCLUSION

44  
45  
46 In summary, this systematic review will rigorously and systematically collate and synthesise  
47 current evidence linking the key lactogenic hormones hPL and PRL to maternal metabolic  
48 health in pregnancy and postpartum (and thus to related infant outcomes). Both hormones have  
49 key roles in the maintenance of glucose homeostasis during pregnancy, including direct actions  
50 on the beta-cells of the maternal endocrine pancreas. However, the exact roles of these  
51 hormones – particularly in metabolically abnormal pregnancies – remain unclear, and evidence  
52 is conflicting. Further, hPL may have untapped potential clinical application in the antenatal

1  
2  
3 prediction of macrosomia, while the hormonal control of lactation, led by PRL, may regulate  
4 glucose and lipid metabolism and help to guard postpartum women against persistent  
5 dysglycaemia. Through this review process, the available scientific evidence will be  
6 synthesised to clarify these relationships and inform future research and practice in the field of  
7 maternal metabolic and endocrine health.  
8  
9  
10  
11  
12  
13  
14

15 **Author contributions:** KR is the project lead, conceptualised and designed the protocol,  
16 wrote the first draft of the manuscript, and will coordinate and conduct the systematic review  
17 process along with co-reviewer RG. AMM has contributed to the design of the search strategy  
18 and will provide support with evidence synthesis. AM, AJ, and HJT reviewed and edited the  
19 manuscript, and AM, AJ, and HJT will provide oversight and supervision for the systematic  
20 review process. All authors contributed substantial intellectual input to the manuscript in line  
21 with ICMJE criteria for authorship and have approved the final version for publication.  
22  
23  
24  
25  
26  
27  
28  
29  
30  
31

32 **Funding statement:** This research received no specific grant from any funding agency in  
33 the public, commercial or not-for-profit sectors.  
34  
35  
36

37 **Competing interests:** All authors declare no conflicts of interest.  
38  
39

40 **Patient consent for publication:** Not required.  
41  
42

43 **Licensing Statement:** I, the Submitting Author has the right to grant and does grant on  
44 behalf of all authors of the Work (as defined in the below author licence), an exclusive  
45 licence and/or a non-exclusive licence for contributions from authors who are: i) UK Crown  
46 employees; ii) where BMJ has agreed a CC-BY licence shall apply, and/or iii) in accordance  
47 with the terms applicable for US Federal Government officers or employees acting as part of  
48 their official duties; on a worldwide, perpetual, irrevocable, royalty-free basis to BMJ  
49 Publishing Group Ltd ("BMJ") its licensees and where the relevant Journal is co-owned by  
50 BMJ to the co-owners of the Journal, to publish the Work in BMJ Open and any other BMJ  
51 products and to exploit all rights, as set out in our [licence](#).  
52  
53  
54  
55  
56  
57  
58  
59  
60

1  
2  
3  
4  
5  
6 The Submitting Author accepts and understands that any supply made under these terms is  
7  
8 made by BMJ to the Submitting Author unless you are acting as an employee on behalf of  
9  
10 your employer or a postgraduate student of an affiliated institution which is paying any  
11  
12 applicable article publishing charge (“APC”) for Open Access articles. Where the Submitting  
13  
14 Author wishes to make the Work available on an Open Access basis (and intends to pay the  
15  
16 relevant APC), the terms of reuse of such Open Access shall be governed by a Creative  
17  
18 Commons licence – details of these licences and which Creative Commons licence will apply  
19  
20 to this Work are set out in our licence referred to above.  
21  
22  
23  
24  
25  
26  
27  
28  
29  
30  
31  
32

## 33 REFERENCES

- 34  
35  
36 1. Simpson, S., L. Smith, and J. Bowe, *Placental peptides regulating islet adaptation to*  
37 *pregnancy: clinical potential in gestational diabetes mellitus*. *Curr Opin Pharmacol*, 2018. **43**:  
38 p. 59-65.
- 39 2. Bilous, R.W., et al., *Resolving the Gestational Diabetes Diagnosis Conundrum: The Need for*  
40 *a Randomized Controlled Trial of Treatment*. *Diabetes Care*, 2021. **44**(4): p. 858-864.
- 41 3. Plows, J.F., et al., *The Pathophysiology of Gestational Diabetes Mellitus*. *Int J Mol Sci*, 2018.  
42 **19**(11).
- 43 4. Ramos-Roman, M.A., *Prolactin and lactation as modifiers of diabetes risk in gestational*  
44 *diabetes*. *Horm Metab Res*, 2011. **43**(9): p. 593-600.
- 45 5. Handwerker, S. and M. Freemark, *Role of Placental Lactogen and Prolactin in Human*  
46 *Pregnancy*, in *Regulation of Ovarian and Testicular Function*, V.B. Mahesh, et al., Editors.  
47 1987, Springer US: Boston, MA. p. 399-420.
- 48 6. Newbern, D. and M. Freemark, *Placental hormones and the control of maternal metabolism*  
49 *and fetal growth*. *Curr Opin Endocrinol Diabetes Obes*, 2011. **18**(6): p. 409-16.
- 50 7. Sorenson, R.L. and T.C. Brelje, *Adaptation of islets of Langerhans to pregnancy: beta-cell*  
51 *growth, enhanced insulin secretion and the role of lactogenic hormones*. *Horm Metab Res*,  
52 1997. **29**(6): p. 301-7.
- 53 8. Parsons, J.A., T.C. Brelje, and R.L. Sorenson, *Adaptation of islets of Langerhans to*  
54 *pregnancy: increased islet cell proliferation and insulin secretion correlates with the onset of*  
55 *placental lactogen secretion*. *Endocrinology*, 1992. **130**(3): p. 1459-66.
- 56 9. Brelje, T.C., et al., *Effect of homologous placental lactogens, prolactins, and growth*  
57 *hormones on islet B-cell division and insulin secretion in rat, mouse, and human islets:*  
58 *implication for placental lactogen regulation of islet function during pregnancy*.  
59 *Endocrinology*, 1993. **132**(2): p. 879-887.  
60

10. Palomba, S. and J. Daolio, *Pregnancy Endocrinology* ☆, in *Encyclopedia of Endocrine Diseases (Second Edition)*, I. Huhtaniemi and L. Martini, Editors. 2018, Academic Press: Oxford. p. 408-417.
11. Freemark, M., *Regulation of Maternal Metabolism by Pituitary and Placental Hormones: Roles in Fetal Development and Metabolic Programming*. Hormone Research in Paediatrics, 2006. **65(suppl 3)**(Suppl. 3): p. 41-49.
12. Sibiak, R., et al., *Placental Lactogen as a Marker of Maternal Obesity, Diabetes, and Fetal Growth Abnormalities: Current Knowledge and Clinical Perspectives*. Journal of Clinical Medicine, 2020. **9**(4): p. 1142.
13. Yavuz, D., et al., *Endothelial function, insulin sensitivity and inflammatory markers in hyperprolactinemic pre-menopausal women*. Eur J Endocrinol, 2003. **149**(3): p. 187-93.
14. Banerjee, R.R., et al., *Gestational Diabetes Mellitus From Inactivation of Prolactin Receptor and MafB in Islet beta-Cells*. Diabetes, 2016. **65**(8): p. 2331-41.
15. Nteeba, J., et al., *Pancreatic prolactin receptor signaling regulates maternal glucose homeostasis*. Journal of endocrinology., 2019. **241**(1): p. 71-83.
16. Stuebe, A.M., et al., *Duration of lactation and incidence of type 2 diabetes*. Jama, 2005. **294**(20): p. 2601-10.
17. Feng, L., et al., *Lactation and progression to type 2 diabetes in patients with gestational diabetes mellitus: A systematic review and meta-analysis of cohort studies*. J Diabetes Investig, 2018. **9**(6): p. 1360-1369.
18. Harreiter, J., et al., *Decreased beta-cell function in breastfeeding obese and non-obese women: A prospective observational study*. Clinical Nutrition, 2019. **38**(6): p. 2790-2798.
19. Retnakaran, R., et al., *Maternal Serum Prolactin and Prediction of Postpartum  $\beta$ -Cell Function and Risk of Prediabetes/Diabetes*. Diabetes Care, 2016. **39**(7): p. 1250-8.
20. Winkvist, A., et al., *Maternal Prepregnant Body Mass Index and Gestational Weight Gain Are Associated with Initiation and Duration of Breastfeeding among Norwegian Mothers*. J Nutr, 2015. **145**(6): p. 1263-70.
21. De Bortoli, J. and L.H. Amir, *Is onset of lactation delayed in women with diabetes in pregnancy? A systematic review*. Diabet Med, 2016. **33**(1): p. 17-24.
22. Rasmussen, K.M. and C.L. Kjolhede, *Prepregnant overweight and obesity diminish the prolactin response to suckling in the first week postpartum*. Pediatrics, 2004. **113**(5): p. e465-71.
23. Nommsen-Rivers, L.A., *Does Insulin Explain the Relation between Maternal Obesity and Poor Lactation Outcomes? An Overview of the Literature*. Advances in nutrition (Bethesda, Md.), 2016. **7**(2): p. 407-414.
24. Page, M.J., et al., *The PRISMA 2020 statement: an updated guideline for reporting systematic reviews*. BMJ, 2021. **372**: p. n71.
25. Moher, D., et al., *Preferred reporting items for systematic review and meta-analysis protocols (PRISMA-P) 2015 statement*. Syst Rev, 2015. **4**(1): p. 1.
26. Schardt, C., et al., *Utilization of the PICO framework to improve searching PubMed for clinical questions*. BMC Med Inform Decis Mak, 2007. **7**: p. 16.
27. MCHRI, *Evidence Synthesis Program templates for critical appraisal and risk of bias (adapted from Critical Appraisal Templates, Centre for Clinical Effectiveness, Southern Health, Melbourne 2010)*. Monash University and Monash Health, 2013.
28. Retnakaran, R., et al., *Evaluation of Circulating Determinants of Beta-Cell Function in Women With and Without Gestational Diabetes*. J Clin Endocrinol Metab, 2016. **101**(7): p. 2683-91.
29. Ngala, R.A., et al., *Placental peptides metabolism and maternal factors as predictors of risk of gestational diabetes in pregnant women. A case-control study*. PLoS One, 2017. **12**(7): p. e0181613.
30. Lolis, D., V. Tzingounis, and D. Kaskarelis, *Maternal serums and amniotic fluid levels of human placental lactogen in gestational diabetes*. European journal of clinical investigation., 1978. **8**(4): p. 259-260.
31. Catalano, P.M., et al., *Downregulated IRS-1 and PPARgamma in obese women with gestational diabetes: relationship to FFA during pregnancy*. American journal of physiology., 2002. **282**(3): p. E522-E533.

- 1
  - 2
  - 3
  - 4
  - 5
  - 6
  - 7
  - 8
  - 9
  - 10
  - 11
  - 12
  - 13
  - 14
  - 15
  - 16
  - 17
  - 18
  - 19
  - 20
  - 21
  - 22
  - 23
  - 24
  - 25
  - 26
  - 27
  - 28
  - 29
  - 30
  - 31
  - 32
  - 33
  - 34
  - 35
  - 36
  - 37
  - 38
  - 39
  - 40
  - 41
  - 42
  - 43
  - 44
  - 45
  - 46
  - 47
  - 48
  - 49
  - 50
  - 51
  - 52
  - 53
  - 54
  - 55
  - 56
  - 57
  - 58
  - 59
  - 60
32. Lopez-Espinoza, I., et al., *High levels of growth hormone and human placental lactogen in pregnancy complicated by diabetes*. Diabetes Res, 1986. **3**(3): p. 119-25.
33. Caufriez, A., et al., *Regulation of maternal IGF-I by placental GH in normal and abnormal human pregnancies*. American journal of physiology., 1993. **265**(4 Pt 1): p. E572-E577.
34. Muralimanoharan, S., A. Maloyan, and L. Myatt, *Mitochondrial function and glucose metabolism in the placenta with gestational diabetes mellitus: role of miR-143*. Clinical Science, 2016. **130**(11): p. 931-941.
35. Ursell, W., M. Brudenell, and T. Chard, *Placental Lactogen Levels in Diabetic Pregnancy*. British Medical Journal, 1973. **2**(5858): p. 80-82.
36. Soler, N.G., H.O. Nicholson, and J.M. Malins, *Serial determinations of human placental lactogen in the management of diabetic pregnancy*. Lancet, 1975. **2**(7924): p. 54-7.
37. Selenkow, H.A., et al., *Patterns of serum immunoreactive human placental lactogen (IR-HPL) and chorionic gonadotropin (IR-HCG) in diabetic pregnancy*. Diabetes, 1971. **20**(10): p. 696-706.
38. Botta, R.M., et al., *Placental lactogen, progesterone, total estriol and prolactin plasma levels in pregnant women with insulin-dependent diabetes mellitus*. European journal of obstetrics, gynecology and reproductive biology., 1984. **16**(6): p. 393-401.
39. Sacks, D.A. and B.E. Metzger, *Classification of diabetes in pregnancy: time to reassess the alphabet*. Obstetrics and gynecology, 2013. **121**(2 Pt 1): p. 345-348.
40. Nahavandi, S., et al., *Biomarkers for Macrosomia Prediction in Pregnancies Affected by Diabetes*. Frontiers in Endocrinology, 2018. **9**(407).
41. Ray, D.A., *Biochemical fetal assessment*. Clinical Obstetrics and Gynecology, 1987. **30**(4): p. 887-898.
42. Henderson, C.E. and M.Y. Divon, *Combining human placental lactogen with routine glucose challenge tests*. Prim Care Update Ob Gyns, 1998. **5**(4): p. 189-190.
43. Skouby, S.O., et al., *Prolactin and glucose tolerance in normal and gestational diabetic pregnancy*. Obstet Gynecol, 1986. **67**(1): p. 17-20.
44. Li, M., et al., *Plasma Prolactin and Progesterone Levels and the Risk of Gestational Diabetes: A Prospective and Longitudinal Study in a Multiracial Cohort*. Front Endocrinol (Lausanne), 2020. **11**: p. 83.
45. Ekinci, E.I., et al., *Higher maternal serum prolactin levels are associated with reduced glucose tolerance during pregnancy*. J Diabetes Investig, 2017. **8**(5): p. 697-700.
46. Overgaard, M., et al., *Maternal prolactin is associated with glucose status and PCOS in pregnancy: Odense Child Cohort*. Eur J Endocrinol, 2020. **183**(3): p. 307-316.
47. Kautzky-Willer, A., et al., *Increased intramyocellular lipid concentration identifies impaired glucose metabolism in women with previous gestational diabetes*. Diabetes, 2003. **52**(2): p. 244-51.

Ovid MEDLINE(R) and Epub Ahead of Print, In-Process, In-Data-Review & Other Non-Indexed Citations, Daily and Versions(R) <1946 to current>

- 1 (pregnan\* or gestation\* or post?partum or post-partum or lactat\* or breastfe\*).ti,ab.
- 2 exp pregnancy/
- 3 postpartum period/
- 4 lactation/
- 5 Breast Feeding/
- 6 1 or 2 or 3 or 4 or 5
- 7 prolactin.ti,ab.
- 8 prolactin/
- 9 placenta\* lactogen\*.ti,ab.
- 10 placental lactogen/
- 11 somato-mammotropin.ti,ab.
- 12 somato?mammotropin.ti,ab.
- 13 7 or 8 or 9 or 10 or 11 or 12
- 14 ((pregnan\* or gestation\* or matern\* or post?partum or post-partum or birth or f?etal or baby or infant\* or newborn\* or neonat\*) adj1 weight\*).ti,ab.
- 15 (placenta\* adj1 weight\*).ti,ab.
- 16 (placenta\* adj1 mass\*).ti,ab.
- 17 (diabet\* or glucose or obes\* or metabolic).ti,ab.
- 18 polycystic ovar\*.ti,ab.
- 19 exp diabetes mellitus/
- 20 glucose intolerance/
- 21 exp diabetes, gestational/
- 22 obesity, maternal/
- 23 birth weight/
- 24 fetal weight/
- 25 polycystic ovary syndrome/
- 26 pregnancy outcome/
- 27 14 or 15 or 16 or 17 or 18 or 19 or 20 or 21 or 22 or 23 or 24 or 25 or 26
- 28 6 and 13 and 27
- 29 exp animals/ not humans.sh.
- 30 28 not 29



Embase Classic+Embase <1947 to current>

- 1 (pregnan\* or gestation\* or post?partum or post-partum or lactat\* or breastfe\*).ti,ab.
- 2 exp pregnancy/
- 3 lactation/
- 4 breast feeding/
- 5 1 or 2 or 3 or 4
- 6 prolactin.ti,ab.
- 7 prolactin/
- 8 placenta\* lactogen\*.ti,ab.
- 9 placenta lactogen/
- 10 somato-mammotropin.ti,ab.
- 11 somato?mammotropin.ti,ab.
- 12 6 or 7 or 8 or 9 or 10 or 11
- 13 ((pregnan\* or gestation\* or matern\* or post?partum or post-partum or birth or f?etal or baby or infant\* or newborn\* or neonat\*) adj1 weight\*).ti,ab.
- 14 (placenta\* adj1 weight\*).ti,ab.
- 15 (placenta\* adj1 mass\*).ti,ab.
- 16 (diabet\* or glucose or obes\* or metabolic).ti,ab.
- 17 polycystic ovar\*.ti,ab.
- 18 exp diabetes mellitus/
- 19 glucose intolerance/
- 20 pregnancy diabetes mellitus/
- 21 maternal obesity/
- 22 birth weight/
- 23 fetus weight/
- 24 ovary polycystic disease/
- 25 pregnancy outcome/
- 26 13 or 14 or 15 or 16 or 17 or 18 or 19 or 20 or 21 or 22 or 23 or 24 or 25
- 27 5 and 12 and 26
- 28 (exp animal/ or exp invertebrate/ or nonhuman/ or animal experiment/ or animal tissue/ or animal model/ or exp plant/ or exp fungus/) not (exp human/ or human tissue/)
- 29 27 not 28

## CINAHL PLUS

- 1  
2  
3  
4  
5 S26 S6 AND S12 AND S25  
6  
7 S13 OR S14 OR S15 OR S16 OR S17 OR S18 OR S19 OR S20 OR S21 OR S22 OR S23  
8 S25 OR S24  
9  
10 S24 (MH "Pregnancy Outcomes")  
11  
12 S23 (MH "Polycystic Ovary Syndrome")  
13  
14 S22 (MH "Fetal Weight")  
15  
16 S21 (MH "Birth Weight")  
17  
18 S20 (MH "Obesity, Maternal")  
19  
20 S19 (MH "Diabetes Mellitus, Gestational")  
21  
22 S18 (MH "Glucose Intolerance")  
23  
24 S17 (MH "Diabetes Mellitus+")  
25  
26 S16 polycystic ovar\*  
27  
28 S15 diabet\* or glucose or obes\* or metabolic  
29  
30 S14 placenta\* N1 (weight\* OR mass\*)  
31 (pregnan\* or gestation\* or matern\* or post?partum or postpartum or birth or f?etal or baby  
32 or infant\* or newborn\* or neonat\*) N1 weight\*  
33  
34 S12 S7 OR S8 OR S9 OR S10 OR S11  
35  
36 S11 somatomammotropin  
37  
38 S10 (MH "Placental Hormones")  
39  
40 S9 "placenta\* lactogen\*"  
41  
42 S8 (MH "Prolactin")  
43  
44 S7 prolactin  
45  
46 S6 S1 OR S2 OR S3 OR S4 OR S5  
47  
48 S5 (MH "Breast Feeding")  
49  
50 S4 (MH "Lactation")  
51  
52 S3 (MH "Postnatal Period+")  
53  
54 S2 (MH "Pregnancy+")  
55  
56 S1 pregnan\* or gestation\* or post?partum or postpartum or lactat\* or breastfe\*

**Template for critical appraisal of a cohort study**

Document evidence from the article in quotation marks.

|                                                                                                          |                                                                                                                                                                                                                                   |                                                                                                                                                                                                                                             |
|----------------------------------------------------------------------------------------------------------|-----------------------------------------------------------------------------------------------------------------------------------------------------------------------------------------------------------------------------------|---------------------------------------------------------------------------------------------------------------------------------------------------------------------------------------------------------------------------------------------|
| <b>Study ID</b>                                                                                          |                                                                                                                                                                                                                                   |                                                                                                                                                                                                                                             |
| <b>Study citation</b>                                                                                    |                                                                                                                                                                                                                                   |                                                                                                                                                                                                                                             |
| <b>EXTERNAL VALIDITY – IS THIS STUDY AND ITS RESULTS GENERALIZABLE TO MY SYSTEMATIC REVIEW QUESTION?</b> |                                                                                                                                                                                                                                   |                                                                                                                                                                                                                                             |
| <b>Patient/population/participants</b>                                                                   | Describe whether they were gender specific, had a particular condition or the general population, age and any other relevant characteristics (e.g. BMI)                                                                           |                                                                                                                                                                                                                                             |
| <b>Control population (if appropriate)</b>                                                               | Describe whether they were gender specific, had a particular condition or the general population, age and any other relevant characteristics (e.g. BMI)                                                                           |                                                                                                                                                                                                                                             |
| <b>N</b>                                                                                                 | Where possible, list the number of participants that were: <ul style="list-style-type: none"> <li>• Screened</li> <li>• Enrolled</li> <li>• Allocated/randomised</li> <li>• Assessed</li> <li>• Followed up</li> </ul>            |                                                                                                                                                                                                                                             |
| <b>Setting</b>                                                                                           | List where the intervention was conducted and assessed ie. hospital, clinic, community and/or university setting.                                                                                                                 |                                                                                                                                                                                                                                             |
| <b>Intervention/indicator</b>                                                                            | Describe the intervention in as much detail as possible e.g. medication type, dose, duration, intervals.                                                                                                                          |                                                                                                                                                                                                                                             |
| <b>Comparison/control</b>                                                                                | Describe the comparison in as much detail as possible e.g. medication type, dose, duration, intervals.                                                                                                                            |                                                                                                                                                                                                                                             |
| <b>Outcomes</b>                                                                                          | List what the study measured (e.g. weight, BMI, HbA1c) as primary outcomes and secondary outcomes. If the outcomes are not relevant to your systematic review, list these as measured but not relevant to your systematic review. |                                                                                                                                                                                                                                             |
| <b>Does the study have a clearly focused question and/or PICO?</b>                                       | Yes<br>Partial<br>No<br>Not reported                                                                                                                                                                                              | Consider if the question is ‘focused’ in terms of: <ul style="list-style-type: none"> <li>– the population studied</li> <li>– the intervention given or exposure</li> <li>– the comparison(s)</li> <li>– the outcomes considered</li> </ul> |
| <b>Inclusion Criteria</b>                                                                                | Yes<br>No<br>Not reported                                                                                                                                                                                                         |                                                                                                                                                                                                                                             |
| <b>Exclusion Criteria</b>                                                                                | Yes<br>No<br>Not reported                                                                                                                                                                                                         |                                                                                                                                                                                                                                             |
| <b>If there were specified inclusion/ exclusion criteria, were these appropriate?</b>                    | Yes<br>Partial<br>No<br>N/A                                                                                                                                                                                                       | Consider if: <ul style="list-style-type: none"> <li>- the eligibility criteria used to specify the patients, interventions/ exposures and outcomes of interest.</li> </ul>                                                                  |
| <b>Is a cohort study the appropriate design to answer this question?</b>                                 | Yes<br>Partial<br>No                                                                                                                                                                                                              | Consider if a cohort study is a good way of answering the question under the circumstances.                                                                                                                                                 |
| <b>Were the outcomes measured appropriate?</b>                                                           | Yes<br>Partial<br>No<br>Not reported                                                                                                                                                                                              | Consider if the outcomes measured are appropriate and important outcome.                                                                                                                                                                    |
| <b>Was there sufficient duration of follow-up for outcomes to occur?</b>                                 | Yes<br>Partial<br>No<br>Not reported                                                                                                                                                                                              | May need to check with clinicians regarding what is sufficient duration for important events to occur.<br>An acceptable length of time should be decided before quality/risk of bias assessment begins.                                     |

| <b>INTERNAL VALIDITY – HAS THIS STUDY BEEN CONDUCTED RIGOROUSLY IN ORDER TO REDUCE BIAS?</b> |                                                                                                        |                                      |                                                                                                                                                                                                                                                                                                                                                                                                                                                                                                                                                                                                                                                                                                                                                                                                                                                                            |
|----------------------------------------------------------------------------------------------|--------------------------------------------------------------------------------------------------------|--------------------------------------|----------------------------------------------------------------------------------------------------------------------------------------------------------------------------------------------------------------------------------------------------------------------------------------------------------------------------------------------------------------------------------------------------------------------------------------------------------------------------------------------------------------------------------------------------------------------------------------------------------------------------------------------------------------------------------------------------------------------------------------------------------------------------------------------------------------------------------------------------------------------------|
| <b>SELECTION BIAS</b>                                                                        | <b>Other than the exposure under investigation, were the groups selected from similar populations?</b> | Yes<br>Partial<br>No<br>Not reported | Consider:<br>- whether the different sources would affect outcomes e.g. one group recruited from hospital(s) the other from the community.<br>- time periods i.e. historical cohort<br>- whether there is a large difference in participation rate between the two arms of the study.                                                                                                                                                                                                                                                                                                                                                                                                                                                                                                                                                                                      |
|                                                                                              | <b>Was the exposed cohort truly representative?</b>                                                    | Yes<br>Partial<br>No<br>Not reported | This item is assessing the representativeness of exposed individuals in the community relevant to the study's PICO, not the representativeness of the sample of individuals in the general population.<br>Consider:<br>- whether truly representative in the community (least bias)<br>- whether somewhat representative (some bias)<br>- whether selected group of users (bias)<br>- no description of the derivation of the cohort (most bias)                                                                                                                                                                                                                                                                                                                                                                                                                           |
|                                                                                              | <b>Is it clear that the outcome of interest was not present at the start of study?</b>                 | Yes<br>Partial<br>No<br>Not reported | In the case of mortality studies, outcome of interest is still the presence of a disease/ incident, rather than death. That is to say that a statement of no history of disease or incident is least biased.                                                                                                                                                                                                                                                                                                                                                                                                                                                                                                                                                                                                                                                               |
| <b>PERFORMAN<br/>CE BIAS</b>                                                                 | <b>Aside from the exposure, were the groups treated the same?</b>                                      | Yes<br>Partial<br>No<br>Not reported | To be sure it's the exposure which is responsible for the effect.                                                                                                                                                                                                                                                                                                                                                                                                                                                                                                                                                                                                                                                                                                                                                                                                          |
| <b>DETECTION BIAS</b>                                                                        | <b>Was exposure measured in a standard, valid and reliable way?</b>                                    | Yes<br>Partial<br>No<br>Not reported | Where exposure measures require any degree of subjectivity, some evidence should be provided that the measures used are reliable and have been validated prior to their use in the study.<br>Consider whether ascertainment of exposure was determined by:<br>- secure record (eg surgical records) (least bias)<br>- structured interview<br>- written self report (bias)<br>- no description (most bias)                                                                                                                                                                                                                                                                                                                                                                                                                                                                 |
|                                                                                              | <b>Were outcome assessors blind to the exposure?</b>                                                   | Yes<br>Partial<br>No<br>Not reported | Consider:<br>- If the outcome is objective (e.g. death) then blinding is less critical.<br>- If the outcome is subjective (e.g. symptoms or function) then blinding of the outcome assessor is critical.                                                                                                                                                                                                                                                                                                                                                                                                                                                                                                                                                                                                                                                                   |
|                                                                                              | <b>Were all outcomes measured in a standard, valid and reliable way?</b>                               | Yes<br>Partial<br>No<br>Not reported | Where outcome measures require any degree of subjectivity, some evidence should be provided that the measures used are reliable and have been validated prior to their use in the study.<br>For some outcomes (e.g. fractured hip), reference to the medical record is sufficient to satisfy the requirement for confirmation of the fracture. This would not be adequate for vertebral fracture outcomes where reference to x-rays would be required.<br>Consider whether outcomes were determined through:<br>- independent blind assessment or confirmation of the outcome by reference to secure records (x-rays, medical records, etc.) (least bias)<br>- record linkage (e.g. identified through codes on database records)<br>- self report (i.e. no reference to original medical records or x-rays to confirm the outcome) (bias)<br>- no description (most bias) |

|                                     |                                                                                                        |                                                           |                                                                                                                                                                                                                                                                                                                                                                                                                                                                                                                                                                                                                                |
|-------------------------------------|--------------------------------------------------------------------------------------------------------|-----------------------------------------------------------|--------------------------------------------------------------------------------------------------------------------------------------------------------------------------------------------------------------------------------------------------------------------------------------------------------------------------------------------------------------------------------------------------------------------------------------------------------------------------------------------------------------------------------------------------------------------------------------------------------------------------------|
|                                     | <b>Were outcomes assessed objectively and independently?</b>                                           | Yes<br>Partial<br>No<br>Not reported                      | Independence of assessment is important where the result of one outcome may effect the interpretation of another.<br>When outcomes are objectively assessed, their independence from each other is less important.                                                                                                                                                                                                                                                                                                                                                                                                             |
| <b>ATTRITION BIAS</b>               | <b>What percentage of the individuals recruited into each arm of the study were lost to follow up?</b> | X% treatment<br>X% control/<br>comparison<br>Not reported | Consider:<br>- if all patients who entered the trial were properly accounted for and attributed at its conclusion.<br>- why patients dropped out, as well as how many.<br>- the drop out rate may be expected to be higher in studies conducted over a long period of time.<br>- if comparisons were made between participants followed-up and those lost to follow up, by exposure status.                                                                                                                                                                                                                                    |
|                                     | <b>What percentage of the individuals were not included in the analysis?</b>                           | X% treatment<br>X% control/<br>comparison<br>Not reported | Consider:<br>- if analysis was as per protocol or intention to treat<br>- number of crossovers<br>- reason for crossover                                                                                                                                                                                                                                                                                                                                                                                                                                                                                                       |
| <b>REPORT BIAS</b>                  | <b>Is the paper free of selective outcome reporting?</b>                                               | Yes<br>Partial<br>No<br>Not reported                      | Consider:<br>- if all the planned outcomes were measured<br>- if all the measured outcomes were reported<br>- if any additional or composite outcomes were measured.<br>This is difficult to determine if there isn't a protocol.                                                                                                                                                                                                                                                                                                                                                                                              |
| <b>CONFOUNDING</b>                  | <b>Are the cohorts comparable on the basis of design or analysis?</b>                                  | Yes<br>Partial<br>No<br>Not reported                      | Consider<br>- either exposed and non-exposed individuals must be matched in the design and/or confounders must be adjusted for in the analysis.<br>- statements of no differences between groups or that differences were not statistically significant are not sufficient for establishing comparability.<br>Note: If the relative risk for the exposure of interest is adjusted for the confounders listed, then the groups will be considered to be comparable on each variable used in the adjustment.                                                                                                                     |
| <b>OTHER INTERNAL VALIDITY/BIAS</b> | <b>Were there any conflicts of interest in the writing or funding of this study?</b>                   | Yes<br>No<br>Not reported                                 | Consider:<br>- if any of the authors are/were employed, sponsored etc by pharmaceutical companies, or have other financial/other ties<br>- if any commercial companies were involved in funding, writing, editing, data analysis or manuscript approval                                                                                                                                                                                                                                                                                                                                                                        |
|                                     | <b>Was the study sufficiently powered to detect any differences between the groups?</b>                | Yes<br>Partial<br>No<br>Not reported                      | Consider:<br>- if an adequate sample size calculation was undertaken<br>- if the required sample size recruited and retained<br>- for which outcomes the study was powered<br>- if confidence intervals include a clinically important difference, the study was underpowered<br>NB this is less important if significant differences were found.                                                                                                                                                                                                                                                                              |
|                                     | <b>If statistical analysis was undertaken, was this appropriate?</b>                                   | Yes<br>Partial<br>No<br>Not reported<br>N/A               | Consider:<br>- whether the authors performed any statistical tests or just presented figures<br>- if the statistical analysis was planned a priori<br>- if the data were analysed accordingly to the study protocol.<br>- the type of data and the statistical tests used. (Please refer to the CCE workbook as required)<br>- use of parametric versus non-parametric tests; whether the data has been checked for normality<br>- if the tests used are obscure, why did the authors used them and have they included a reference.<br>- if point estimates and measures of variability were presented for the primary outcome |

|                                          |                                                                                                           |                                                                                                                                                                                                                                                                                                                                                                                                                                                                                                                                                                                        |
|------------------------------------------|-----------------------------------------------------------------------------------------------------------|----------------------------------------------------------------------------------------------------------------------------------------------------------------------------------------------------------------------------------------------------------------------------------------------------------------------------------------------------------------------------------------------------------------------------------------------------------------------------------------------------------------------------------------------------------------------------------------|
|                                          |                                                                                                           | <ul style="list-style-type: none"> <li>- if subgroups were analysed appropriately</li> <li>- if potential confounders were identified and taken into account in the analysis</li> <li>- if there was any adjustment made for multiple testing</li> <li>- if missing data was handled appropriately</li> </ul>                                                                                                                                                                                                                                                                          |
| <b>Comments</b>                          | <i>Add any other relevant comments, including if this is likely to influence the results of the study</i> |                                                                                                                                                                                                                                                                                                                                                                                                                                                                                                                                                                                        |
| <b>What is the overall risk of bias?</b> | Low<br>Moderate<br>High<br>Insufficient information                                                       | <i>Low - All of the criteria have been fulfilled or where criteria have not been fulfilled it is very unlikely the conclusions of the study would be affected.</i><br><i>Moderate - Some of the criteria have been fulfilled and those criteria that have not been fulfilled may affect the conclusions of the study.</i><br><i>High - Few or no criteria fulfilled or the conclusions of the study are likely or very likely to be affected.</i><br><i>Insufficient information – not enough information provided on methodological quality to be able to determine risk of bias.</i> |

**Cited in full as:** Monash Centre for Health Research and Implementation (MCHRI) Evidence Synthesis Program template for critical appraisal of a cohort study (2014), MCHRI – Monash University and Monash Health, Melbourne, Australia (*adapted from* Critical Appraisal Templates (2010) Centre for Clinical Effectiveness, Southern Health, Melbourne, Australia AND Wells G, Shea B, O'Connell D, Peterson J, Welch V, Losos M, Tugwell P. The Newcastle–Ottawa Scale (NOS) for assessing the quality of nonrandomized studies in meta-analyses. In: Proceedings of the 3rd Symposium on Systematic Reviews Beyond the Basics: Improving Quality and Impact. Oxford; 2000. p. 3-5).

# Reporting checklist for protocol of a systematic review and meta analysis.

Based on the PRISMA-P guidelines.

|                     |                     |                                                                                                                                           | Page                |
|---------------------|---------------------|-------------------------------------------------------------------------------------------------------------------------------------------|---------------------|
|                     |                     | Reporting Item                                                                                                                            | Number              |
| <b>Title</b>        |                     |                                                                                                                                           |                     |
| Identification      | <a href="#">#1a</a> | Identify the report as a protocol of a systematic review                                                                                  | 1                   |
| Update              | <a href="#">#1b</a> | If the protocol is for an update of a previous systematic review, identify as such                                                        | n/a - not an update |
| <b>Registration</b> |                     |                                                                                                                                           |                     |
|                     | <a href="#">#2</a>  | If registered, provide the name of the registry (such as PROSPERO) and registration number                                                | 2                   |
| <b>Authors</b>      |                     |                                                                                                                                           |                     |
| Contact             | <a href="#">#3a</a> | Provide name, institutional affiliation, e-mail address of all protocol authors; provide physical mailing address of corresponding author | 1                   |
| Contribution        | <a href="#">#3b</a> | Describe contributions of protocol authors and identify the guarantor of the review                                                       | 20                  |
| <b>Amendments</b>   |                     |                                                                                                                                           |                     |

|    |                      |                                                               |          |
|----|----------------------|---------------------------------------------------------------|----------|
| 1  |                      |                                                               |          |
| 2  |                      |                                                               |          |
| 3  |                      |                                                               |          |
| 4  |                      |                                                               |          |
| 5  |                      |                                                               |          |
| 6  |                      |                                                               |          |
| 7  |                      |                                                               |          |
| 8  |                      |                                                               |          |
| 9  |                      |                                                               |          |
| 10 |                      |                                                               |          |
| 11 | <b>Support</b>       |                                                               |          |
| 12 |                      |                                                               |          |
| 13 |                      |                                                               |          |
| 14 | Sources              | <a href="#">#4</a>                                            | 9        |
| 15 |                      | If the protocol represents an amendment of a previously       |          |
| 16 |                      | completed or published protocol, identify as such and list    |          |
| 17 |                      | changes; otherwise, state plan for documenting important      |          |
| 18 |                      | protocol amendments                                           |          |
| 19 |                      |                                                               |          |
| 20 |                      |                                                               |          |
| 21 |                      |                                                               |          |
| 22 |                      |                                                               |          |
| 23 |                      |                                                               |          |
| 24 |                      |                                                               |          |
| 25 | Sources              | <a href="#">#5a</a>                                           | 20       |
| 26 |                      | Indicate sources of financial or other support for the review |          |
| 27 | Sponsor              | <a href="#">#5b</a>                                           | n/a - no |
| 28 |                      | Provide name for the review funder and / or sponsor           | specific |
| 29 |                      |                                                               | funding  |
| 30 |                      |                                                               |          |
| 31 |                      |                                                               |          |
| 32 |                      |                                                               |          |
| 33 | Role of sponsor or   | <a href="#">#5c</a>                                           | 20       |
| 34 | funder               | Describe roles of funder(s), sponsor(s), and / or             |          |
| 35 |                      | institution(s), if any, in developing the protocol            |          |
| 36 |                      |                                                               |          |
| 37 |                      |                                                               |          |
| 38 | <b>Introduction</b>  |                                                               |          |
| 39 |                      |                                                               |          |
| 40 |                      |                                                               |          |
| 41 |                      |                                                               |          |
| 42 |                      |                                                               |          |
| 43 | Rationale            | <a href="#">#6</a>                                            | 4-8      |
| 44 |                      | Describe the rationale for the review in the context of what  |          |
| 45 |                      | is already known                                              |          |
| 46 |                      |                                                               |          |
| 47 |                      |                                                               |          |
| 48 | Objectives           | <a href="#">#7</a>                                            | 8        |
| 49 |                      | Provide an explicit statement of the question(s) the review   |          |
| 50 |                      | will address with reference to participants, interventions,   |          |
| 51 |                      | comparators, and outcomes (PICO)                              |          |
| 52 |                      |                                                               |          |
| 53 |                      |                                                               |          |
| 54 |                      |                                                               |          |
| 55 | <b>Methods</b>       |                                                               |          |
| 56 |                      |                                                               |          |
| 57 |                      |                                                               |          |
| 58 | Eligibility criteria | <a href="#">#8</a>                                            | 9-10     |
| 59 |                      | Specify the study characteristics (such as PICO, study        |          |
| 60 |                      | design, setting, time frame) and report characteristics       |          |
|    |                      | (such as years considered, language, publication status)      |          |
|    |                      | to be used as criteria for eligibility for the review         |          |



|    |                   |                      |                                                                 |       |
|----|-------------------|----------------------|-----------------------------------------------------------------|-------|
| 1  | Information       | <a href="#">#9</a>   | Describe all intended information sources (such as              | 11    |
| 2  |                   |                      |                                                                 |       |
| 3  | sources           |                      | electronic databases, contact with study authors, trial         |       |
| 4  |                   |                      | registers or other grey literature sources) with planned        |       |
| 5  |                   |                      | dates of coverage                                               |       |
| 6  |                   |                      |                                                                 |       |
| 7  |                   |                      |                                                                 |       |
| 8  |                   |                      |                                                                 |       |
| 9  |                   |                      |                                                                 |       |
| 10 |                   |                      |                                                                 |       |
| 11 | Search strategy   | <a href="#">#10</a>  | Present draft of search strategy to be used for at least one    | 11    |
| 12 |                   |                      |                                                                 |       |
| 13 |                   |                      | electronic database, including planned limits, such that it     |       |
| 14 |                   |                      | could be repeated                                               |       |
| 15 |                   |                      |                                                                 |       |
| 16 |                   |                      |                                                                 |       |
| 17 |                   |                      |                                                                 |       |
| 18 | Study records -   | <a href="#">#11a</a> | Describe the mechanism(s) that will be used to manage           | 11    |
| 19 |                   |                      |                                                                 |       |
| 20 | data management   |                      | records and data throughout the review                          |       |
| 21 |                   |                      |                                                                 |       |
| 22 |                   |                      |                                                                 |       |
| 23 |                   |                      |                                                                 |       |
| 24 | Study records -   | <a href="#">#11b</a> | State the process that will be used for selecting studies       | 11-12 |
| 25 |                   |                      |                                                                 |       |
| 26 | selection process |                      | (such as two independent reviewers) through each phase          |       |
| 27 |                   |                      |                                                                 |       |
| 28 |                   |                      | of the review (that is, screening, eligibility and inclusion in |       |
| 29 |                   |                      | meta-analysis)                                                  |       |
| 30 |                   |                      |                                                                 |       |
| 31 |                   |                      |                                                                 |       |
| 32 |                   |                      |                                                                 |       |
| 33 |                   |                      |                                                                 |       |
| 34 | Study records -   | <a href="#">#11c</a> | Describe planned method of extracting data from reports         | 12-14 |
| 35 |                   |                      |                                                                 |       |
| 36 | data collection   |                      | (such as piloting forms, done independently, in duplicate),     |       |
| 37 |                   |                      |                                                                 |       |
| 38 | process           |                      | any processes for obtaining and confirming data from            |       |
| 39 |                   |                      | investigators                                                   |       |
| 40 |                   |                      |                                                                 |       |
| 41 |                   |                      |                                                                 |       |
| 42 |                   |                      |                                                                 |       |
| 43 |                   |                      |                                                                 |       |
| 44 | Data items        | <a href="#">#12</a>  | List and define all variables for which data will be sought     | 13-14 |
| 45 |                   |                      |                                                                 |       |
| 46 |                   |                      | (such as PICO items, funding sources), any pre-planned          |       |
| 47 |                   |                      |                                                                 |       |
| 48 |                   |                      | data assumptions and simplifications                            |       |
| 49 |                   |                      |                                                                 |       |
| 50 |                   |                      |                                                                 |       |
| 51 | Outcomes and      | <a href="#">#13</a>  | List and define all outcomes for which data will be sought,     | 13-14 |
| 52 |                   |                      |                                                                 |       |
| 53 | prioritization    |                      | including prioritization of main and additional outcomes,       |       |
| 54 |                   |                      |                                                                 |       |
| 55 |                   |                      | with rationale                                                  |       |
| 56 |                   |                      |                                                                 |       |
| 57 |                   |                      |                                                                 |       |
| 58 |                   |                      |                                                                 |       |
| 59 |                   |                      |                                                                 |       |
| 60 |                   |                      |                                                                 |       |

|    |                    |                      |                                                                  |           |
|----|--------------------|----------------------|------------------------------------------------------------------|-----------|
| 1  | Risk of bias in    | <a href="#">#14</a>  | Describe anticipated methods for assessing risk of bias of       | 12        |
| 2  |                    |                      |                                                                  |           |
| 3  | individual studies |                      | individual studies, including whether this will be done at       |           |
| 4  |                    |                      |                                                                  |           |
| 5  |                    |                      | the outcome or study level, or both; state how this              |           |
| 6  |                    |                      |                                                                  |           |
| 7  |                    |                      | information will be used in data synthesis                       |           |
| 8  |                    |                      |                                                                  |           |
| 9  |                    |                      |                                                                  |           |
| 10 |                    |                      |                                                                  |           |
| 11 | Data synthesis     | <a href="#">#15a</a> | Describe criteria under which study data will be                 | 14        |
| 12 |                    |                      |                                                                  |           |
| 13 |                    |                      | quantitatively synthesised                                       |           |
| 14 |                    |                      |                                                                  |           |
| 15 |                    |                      |                                                                  |           |
| 16 | Data synthesis     | <a href="#">#15b</a> | If data are appropriate for quantitative synthesis, describe     | 14-15     |
| 17 |                    |                      |                                                                  |           |
| 18 |                    |                      | planned summary measures, methods of handling data               |           |
| 19 |                    |                      |                                                                  |           |
| 20 |                    |                      | and methods of combining data from studies, including            |           |
| 21 |                    |                      |                                                                  |           |
| 22 |                    |                      | any planned exploration of consistency (such as I <sup>2</sup> , |           |
| 23 |                    |                      |                                                                  |           |
| 24 |                    |                      | Kendall's $\tau$ )                                               |           |
| 25 |                    |                      |                                                                  |           |
| 26 |                    |                      |                                                                  |           |
| 27 |                    |                      |                                                                  |           |
| 28 | Data synthesis     | <a href="#">#15c</a> | Describe any proposed additional analyses (such as               | 14-15     |
| 29 |                    |                      |                                                                  |           |
| 30 |                    |                      | sensitivity or subgroup analyses, meta-regression)               |           |
| 31 |                    |                      |                                                                  |           |
| 32 |                    |                      |                                                                  |           |
| 33 |                    |                      |                                                                  |           |
| 34 | Data synthesis     | <a href="#">#15d</a> | If quantitative synthesis is not appropriate, describe the       | 14        |
| 35 |                    |                      |                                                                  |           |
| 36 |                    |                      | type of summary planned                                          |           |
| 37 |                    |                      |                                                                  |           |
| 38 |                    |                      |                                                                  |           |
| 39 | Meta-bias(es)      | <a href="#">#16</a>  | Specify any planned assessment of meta-bias(es) (such            | n/a - not |
| 40 |                    |                      |                                                                  | planned   |
| 41 |                    |                      | as publication bias across studies, selective reporting          |           |
| 42 |                    |                      |                                                                  |           |
| 43 |                    |                      | within studies)                                                  |           |
| 44 |                    |                      |                                                                  |           |
| 45 |                    |                      |                                                                  |           |
| 46 |                    |                      |                                                                  |           |
| 47 | Confidence in      | <a href="#">#17</a>  | Describe how the strength of the body of evidence will be        | 12        |
| 48 |                    |                      |                                                                  |           |
| 49 | cumulative         |                      | assessed (such as GRADE)                                         |           |
| 50 |                    |                      |                                                                  |           |
| 51 | evidence           |                      |                                                                  |           |
| 52 |                    |                      |                                                                  |           |
| 53 |                    |                      |                                                                  |           |
| 54 |                    |                      |                                                                  |           |

## Notes:

- 1b: n/a - not an update

- 1 • 5b: n/a - no specific funding
- 2
- 3
- 4 • 16: n/a - not planned The PRISMA-P elaboration and explanation paper is distributed under the
- 5 terms of the Creative Commons Attribution License CC-BY. This checklist was completed on 07.
- 6 July 2021 using <https://www.goodreports.org/>, a tool made by the [EQUATOR Network](#) in
- 7 collaboration with [Penelope.ai](#)
- 8
- 9
- 10
- 11
- 12
- 13
- 14
- 15
- 16
- 17
- 18
- 19
- 20
- 21
- 22
- 23
- 24
- 25
- 26
- 27
- 28
- 29
- 30
- 31
- 32
- 33
- 34
- 35
- 36
- 37
- 38
- 39
- 40
- 41
- 42
- 43
- 44
- 45
- 46
- 47
- 48
- 49
- 50
- 51
- 52
- 53
- 54
- 55
- 56
- 57
- 58
- 59
- 60
